# Supplementary material for: New shades of photochromism – yellow sodalites for the detection of blue light
Source: Royal Society of Chemistry journal article supplement (doi:10.1039/d3tc00116d), 2023-01-01
Supplement: d3tc00116d1.pdf [file d3tc00116d1.pdf]

New shades of photochromism – yellow sodalites for the detection of blue light

Electronic supplementary information (ESI)

Hannah Byron<sup>a,b</sup>, Teppo Kreivilä<sup>a</sup>, Pauline Colinet<sup>c</sup>, Tangui Le Bahers<sup>c,d</sup>, Mika Lastusaari<sup>\*a</sup>.

<sup>a</sup> Department of Chemistry, University of Turku, FI-20014 Turku, Finland.

<sup>b</sup> University of Turku Graduate School (UTUGS), Doctoral Programme in Exact Sciences (EXACTUS), FI-20014 Turku, Finland

<sup>c</sup> ENSL, CNRS, UCBL, Laboratoire de Chimie, UMR 5182, 46 allée d'Italie, 69634, Lyon, France

<sup>d</sup> Institut Universitaire de France, 5 rue Descartes, 75005 Paris, France

\* Corresponding author: miklas@utu.fi

Contents

|                                                                                                                                                                                                                         |           |
|-------------------------------------------------------------------------------------------------------------------------------------------------------------------------------------------------------------------------|-----------|
| <b>1. XRF results and effect of potassium content on the structure and optical properties.....</b>                                                                                                                      | <b>2</b>  |
| <b>2. Reference XRD diffractograms of impurities and by-products in calcium-containing photochromic sodalites used in Rietveld refinement.....</b>                                                                      | <b>3</b>  |
| <b>3. Reflectance spectra of uncoloured materials.....</b>                                                                                                                                                              | <b>4</b>  |
| <b>4. Simulated structures of Ca<sub>2</sub> and Na<sub>3</sub>Ca, simulated absorbances and band transitions for all four species around V<sub>Cl</sub> and oscillator strengths of all simulated transitions.....</b> | <b>5</b>  |
| <b>5. Unit cell parameters of calcium-containing sodalite and davyne determined by Rietveld refinement (0.27 ≤ x ≤ 1.00).....</b>                                                                                       | <b>6</b>  |
| <b>6. Thermotenebrescence fading of the colored form and initial rise curves.....</b>                                                                                                                                   | <b>7</b>  |
| <b>7. Emission curve of incandescent lamp for correction of fade curves.....</b>                                                                                                                                        | <b>9</b>  |
| <b>8. XRPD and reflectance data for calcium-containing sodalites containing Cl + Br and Cl + I, x = 0.25 and x = 0.00, as well as parameters obtained by Rietveld refinement for these materials.....</b>               | <b>10</b> |
| <b>9. Properties of different light sources used during tenebrescence fading experiments.....</b>                                                                                                                       | <b>12</b> |
| <b>10. Dose-corrected fade curves before normalization.....</b>                                                                                                                                                         | <b>13</b> |
| <b>11. Optimized supercell structures in POSCAR format.....</b>                                                                                                                                                         | <b>13</b> |
| <b>12. References.....</b>                                                                                                                                                                                              | <b>34</b> |

## 1. XRF results and effect of potassium content on the structure and optical properties

Figure S1a shows how the calcium content measured by XRF increases in a linear fashion with  $x$ , i.e. the amount of calcium used in the synthesis. XRD data showed only very small amounts of Ca-containing by-products other than davyne (such as  $\text{CaCl}_2$ ). It was assumed that almost all of the calcium observed by XRF was inside the sodalite structure.

Figure S1b shows the variation in potassium content with sample for Ca-containing sodalites made with zeolite 4A ( $\text{NaAlSiO}_4$ ) and zeolite 3A ( $(\text{Na,K})\text{AlSiO}_4$ ). Although the zeolite 4A-based materials generally contained less potassium than those made with zeolite 3A, there is some overlap in the potassium concentrations, meaning there was not a huge difference between the two starting materials. Additional potassium did not affect the position of the absorption band in the coloured form of either yellow or pink photochromism (figure S1c).

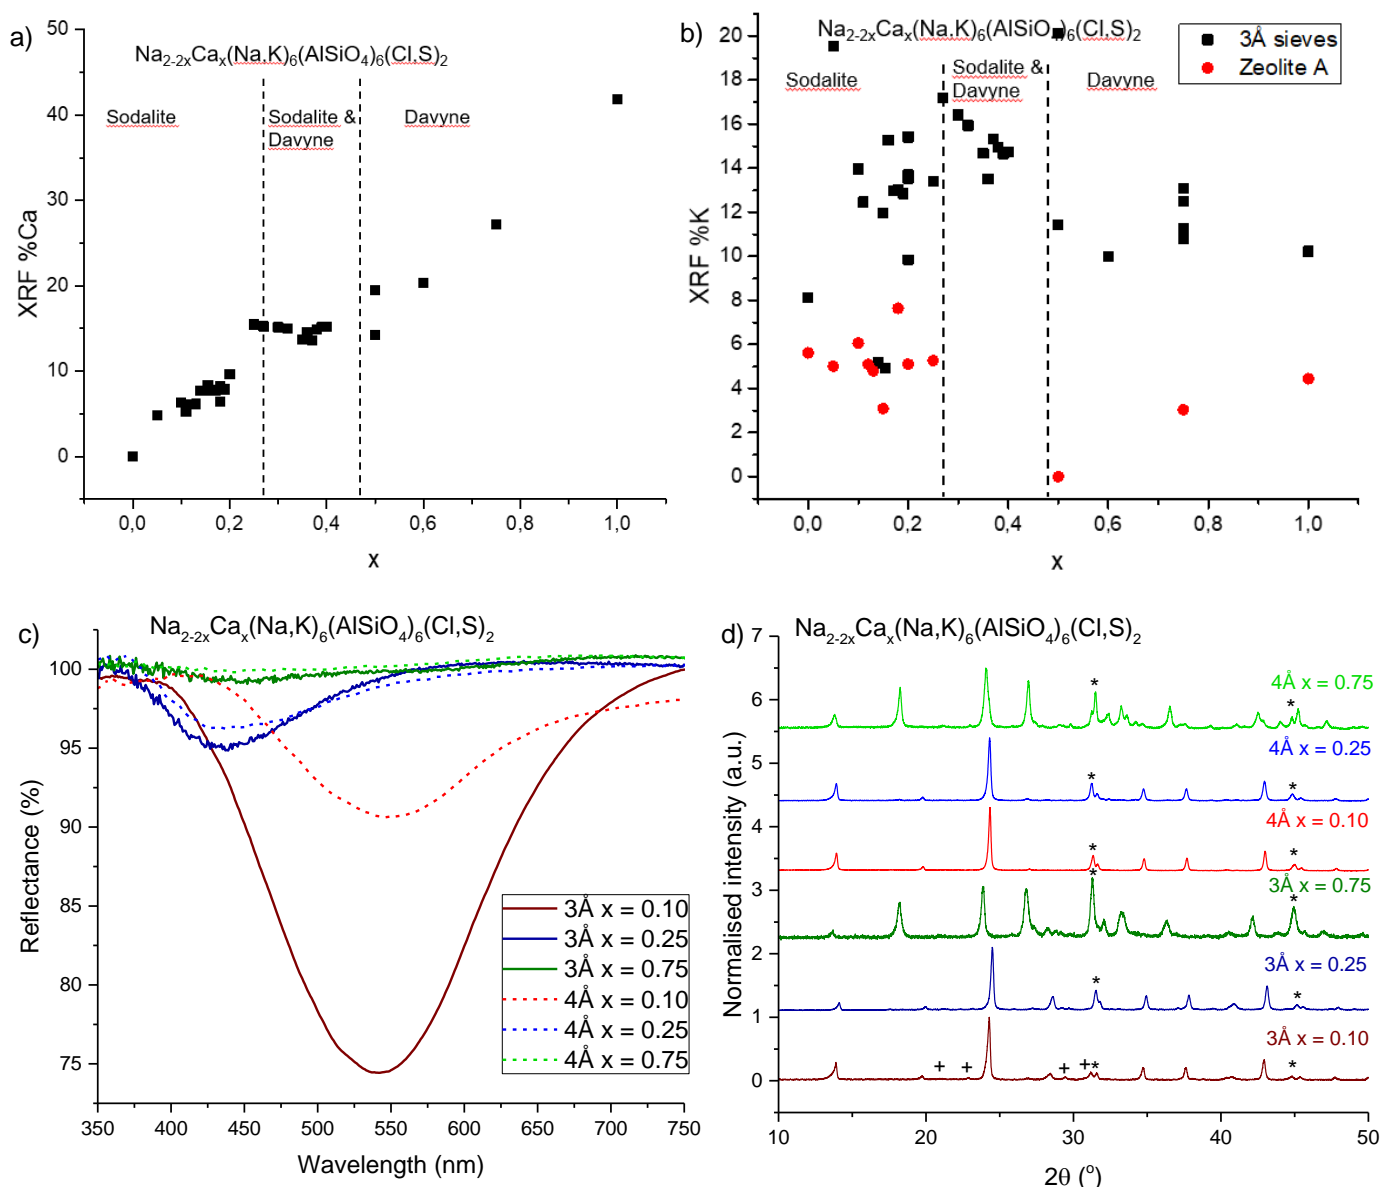

Figure S1: a) Relationship between nominal calcium content,  $x$ , and mol% Ca observed by XRF. b) Amount of potassium present in calcium-containing sodalites made with zeolite 3A and 4A. c) Reflectance of the coloured form of calcium-containing sodalites with three different values of  $x$ , made with both zeolite 3A and 4A. d) XRD diffractograms of the sodalites shown in c). NaCl impurities<sup>1</sup> are indicated with \* and nepheline<sup>2</sup> with +. The main structures are sodalite ( $x = 0.10, 0.25$ )<sup>3</sup> or davyne ( $x = 0.75$ )<sup>4</sup>.

## 2. Reference XRD diffractograms of impurities and by-products in calcium-containing photochromic sodalites used in Rietveld refinement

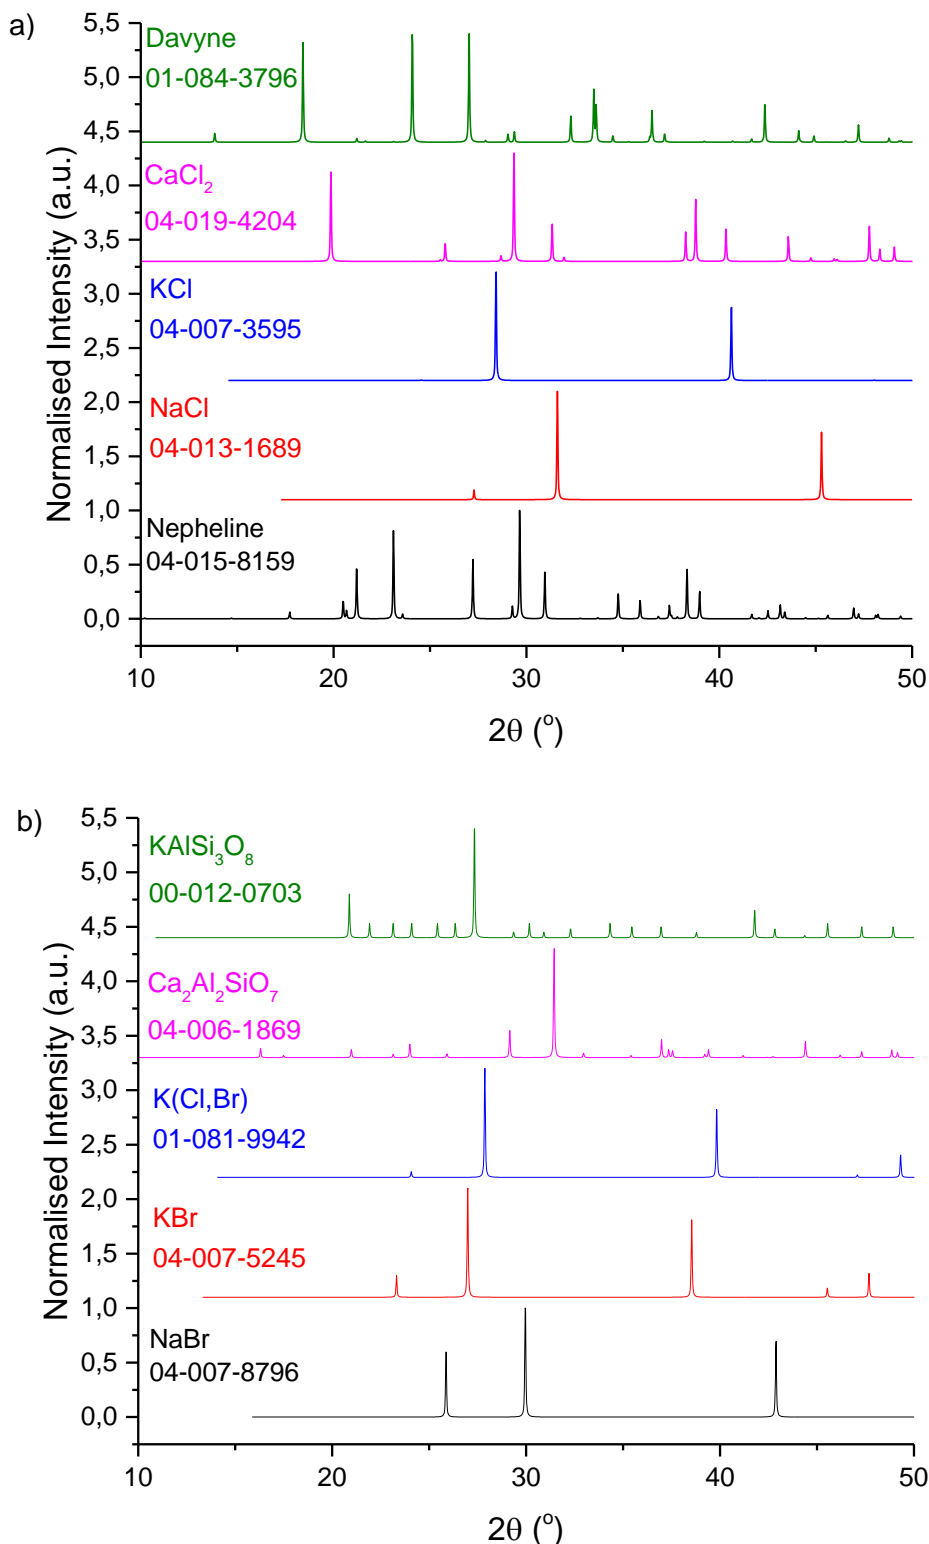

Figure S2: a) Reference diffractograms used in Rietveld refinement of  $0.00 \leq x \leq 1.00$  chlorosodalites: Nepheline (PDF 04-015-8159)<sup>2</sup>, NaCl (PDF 04-013-1689),<sup>1</sup> KCl (PDF 04-007-3595),<sup>7</sup> CaCl<sub>2</sub> (PDF 04-019-4204),<sup>8</sup> and Davyne (PDF 01-084-3796).<sup>4</sup> b) Reference diffractograms used in Rietveld refinement of  $x = 0.00$  and  $x = 0.25$  sodalites containing Cl, Br and I: NaBr (PDF 04-007-8796),<sup>9</sup> KBr (PDF 04-007-5245),<sup>10</sup> K(Cl,Br) (PDF 01-081-9942),<sup>11</sup> Ca<sub>2</sub>Al<sub>2</sub>SiO<sub>7</sub> (PDF 04-006-1869),<sup>12</sup> and KAISi<sub>3</sub>O<sub>8</sub> (PDF 00-012-0703).<sup>13</sup>

### 3. Reflectance spectra of uncoloured materials

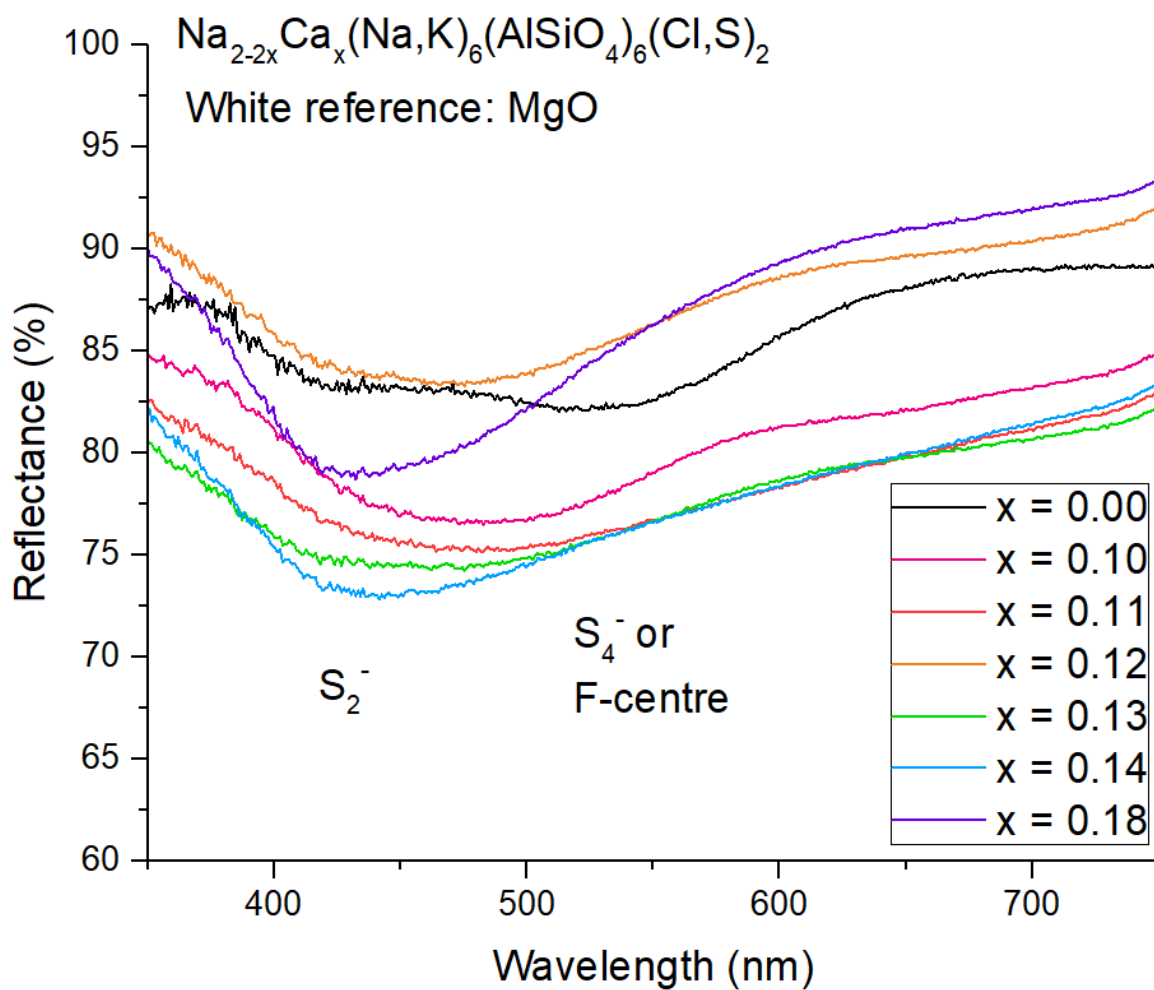

Figure S3: Reflectance spectra of photochromic sodalites before exposure to UV radiation, measured relative to a white reference of pure MgO. The suspected sulfur species responsible for the absorbances of the background colour have been indicated.<sup>5,6</sup>

4. Simulated structures of  $\text{Ca}_2$  and  $\text{Na}_3\text{Ca}$ , simulated absorbances and band transitions for all four species around  $V_{\text{Cl}}$  and oscillator strengths of all simulated transitions.

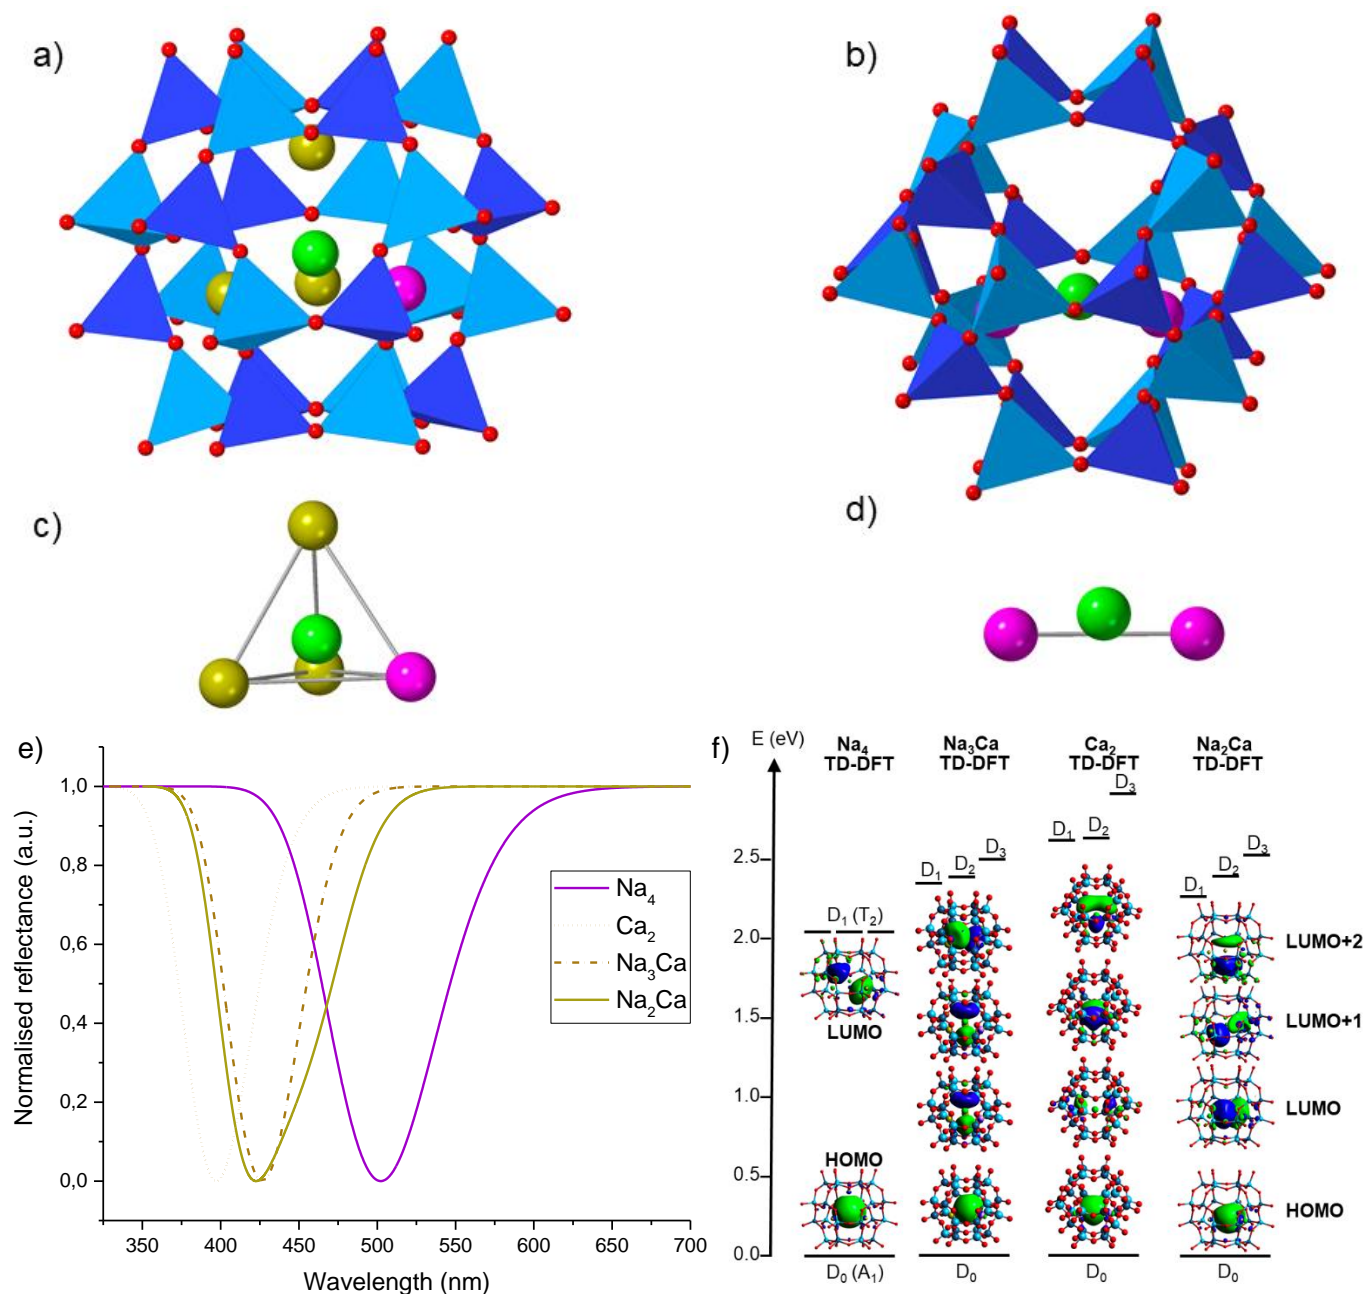

Figure S4: a-d) Structures of the system called  $\text{Na}_3\text{Ca}$  (a, c) and the defective  $\text{Ca}_2$  (b, d) system from DFT optimized geometries showing the full beta cage (a, b) or focusing on the inside of the beta cage (c, d). Dark and light blue polyhedra surround the Si and Al atoms respectively. Red, yellow, pink and green spheres represent the oxygen, sodium and calcium atoms and the center of the cavity respectively. e) Quantum chemically calculated absorbance spectra of the colored form of the F-center formed when  $V_{\text{Cl}}$  is located in a cage containing  $\text{Na}_4$ ,  $\text{Ca}_2$ ,  $\text{Na}_3\text{Ca}$  and  $\text{Na}_2\text{Ca}$  systems. f) Energetic diagram of the three first electronic transitions for the  $\text{Na}_4$ ,  $\text{Ca}_2$ ,  $\text{Na}_3\text{Ca}$  and  $\text{Na}_2\text{Ca}$  systems computed by TD-DFT. The transitions are dominated by the HOMO to the three lowest LUMOs characters (presented as inserts). Excited states are of doublet spin-multiplicity explaining the notation  $D_0$ ,  $D_1$ ,  $D_2$  and  $D_3$  for ground and excited states.

Table S1: Transition energies and oscillator strengths for the F-center's transitions in the colored form of sodalites with the given species surrounding  $V_{Cl}$ .

| Species surrounding $V_{Cl}$ | Transition energy (eV) | Oscillator strength |
|------------------------------|------------------------|---------------------|
| Na <sub>4</sub>              | 2.4688                 | 0.2154              |
| Ca <sub>2</sub>              | 3.0630                 | 0.0825              |
|                              | 3.1115                 | 0.1959              |
|                              | 3.1428                 | 0.1505              |
| Na <sub>3</sub> Ca           | 2.8095                 | 0.2207              |
|                              | 2.8405                 | 0.2164              |
|                              | 2.9757                 | 0.2240              |
| Na <sub>2</sub> Ca           | 2.6864                 | 0.2233              |
|                              | 2.8522                 | 0.1997              |
|                              | 3.0045                 | 0.1793              |

### 5. Unit cell parameters of calcium-containing sodalite and davyne determined by Rietveld refinement ( $0.27 \leq x \leq 1.00$ )

Table S2: Unit cell parameters for sodalite and davyne phases obtained by Rietveld refinement for sodalites with  $0.27 \leq x \leq 1.00$ .

| x    | Sodalite (%) | Sodalite a axis (Å) | Sodalite V (Å <sup>3</sup> ) | Davyne (%) | Davyne a axis (Å) | Davyne c axis (Å) | Davyne V (Å <sup>3</sup> ) |
|------|--------------|---------------------|------------------------------|------------|-------------------|-------------------|----------------------------|
| 0.27 | 52.7         | 8.913               | 708.14                       | 24.6       | 12.918            | 5.318             | 778.64                     |
| 0.32 | 32.9         | 8.900               | 705.01                       | 47.7       | 12.919            | 5.393             | 779.55                     |
| 0.35 | 31.8         | 8.912               | 707.91                       | 47.6       | 12.920            | 5.394             | 779.68                     |
| 0.40 | 16.5         | 8.902               | 705.53                       | 62.9       | 12.911            | 5.391             | 778.25                     |
| 0.50 | 0.0          | -                   | -                            | 79.2       | 12.826            | 5.378             | 766.27                     |
| 0.75 | 0.0          | -                   | -                            | 74.1       | 12.877            | 5.372             | 771.51                     |
| 1.00 | 0.0          | -                   | -                            | 78.0       | 12.895            | 5.313             | 773.82                     |

## 6. Thermotenebrescence fading of the colored form and initial rise curves

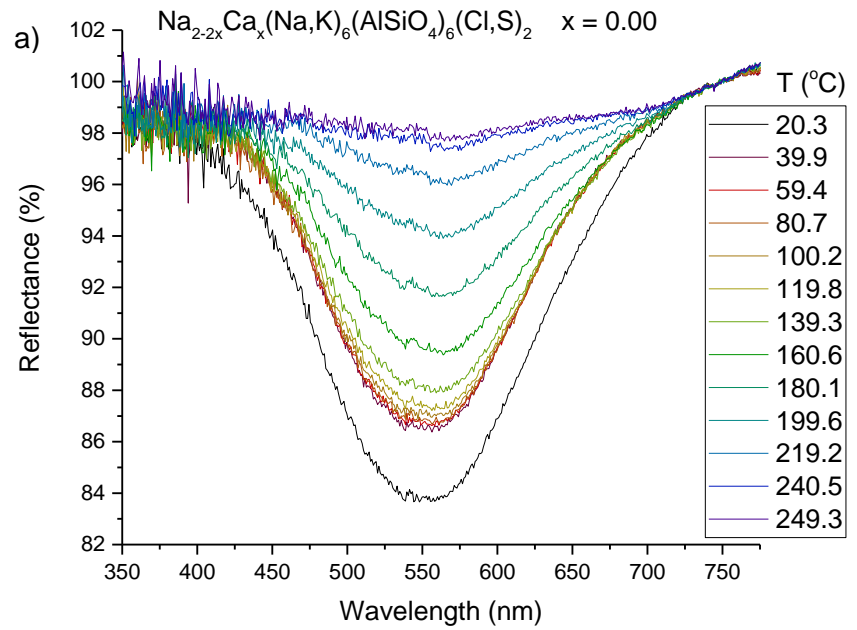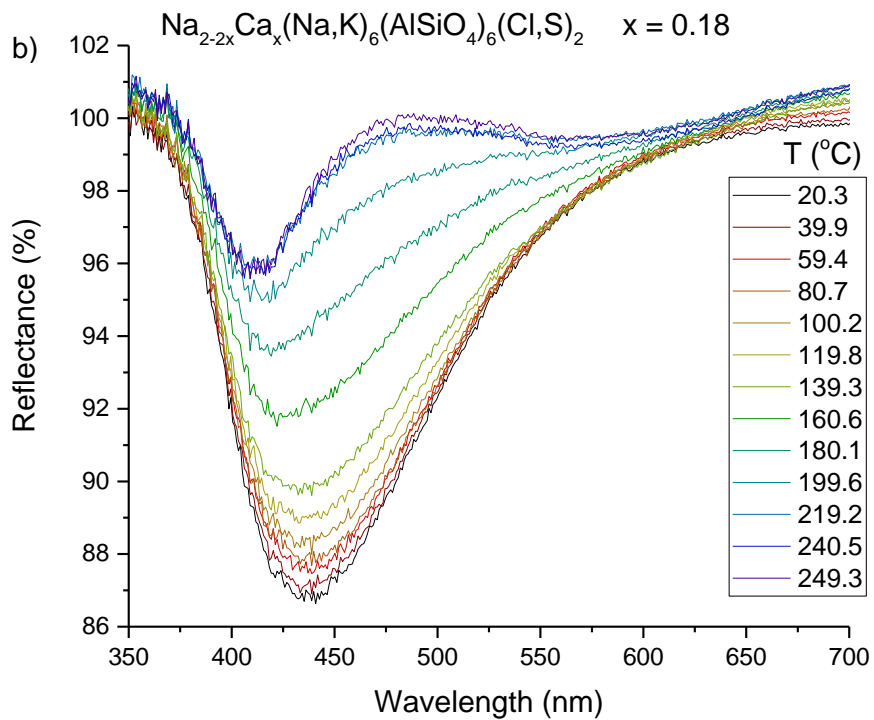

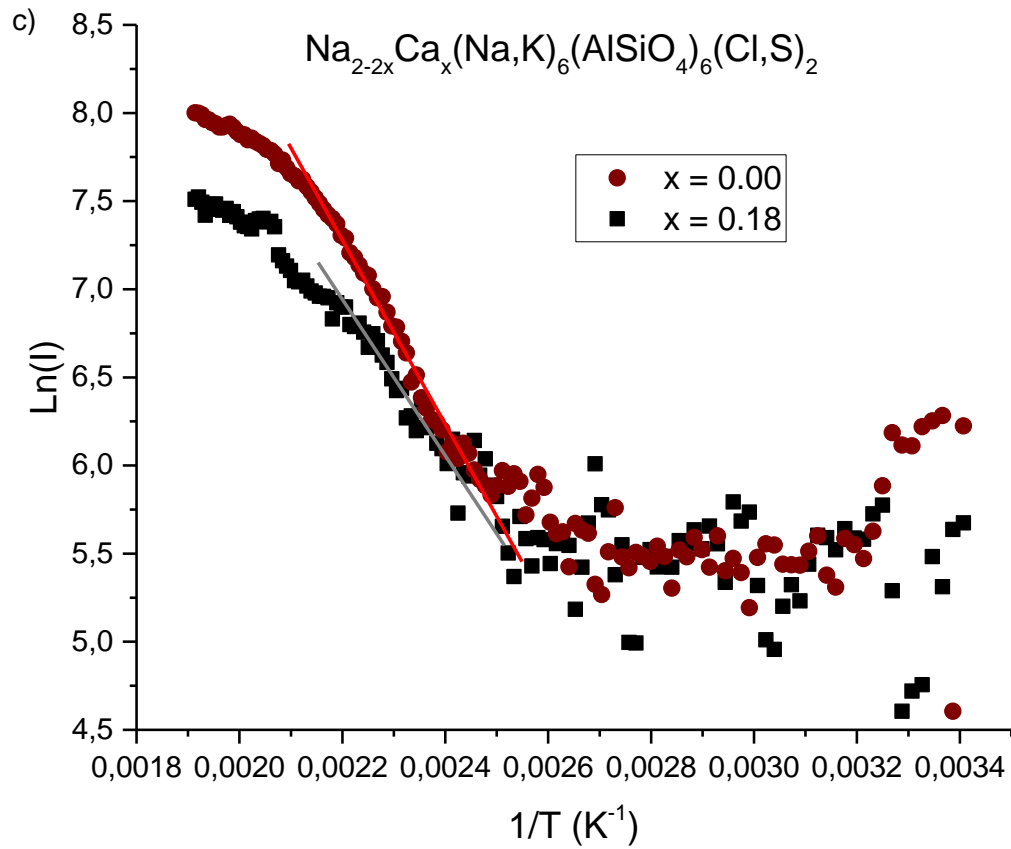

Figure S5: a) Thermotenebescence, i.e. fading of reflectance of the colored form of a calcium-free ( $x = 0.00$ ) photochromic sodalite upon heating. b) Thermotenebescence i.e. fading of reflectance of the colored form of a calcium-containing photochromic sodalite ( $x = 0.18$ ) upon heating. c) Initial rise curves of thermotenebescence obtained for the materials in a) and b). The regions fitted with a straight line used to obtain the trap depth with the initial rise method are indicated.<sup>14</sup>



## 7. Emission curve of incandescent lamp for correction of fade curves

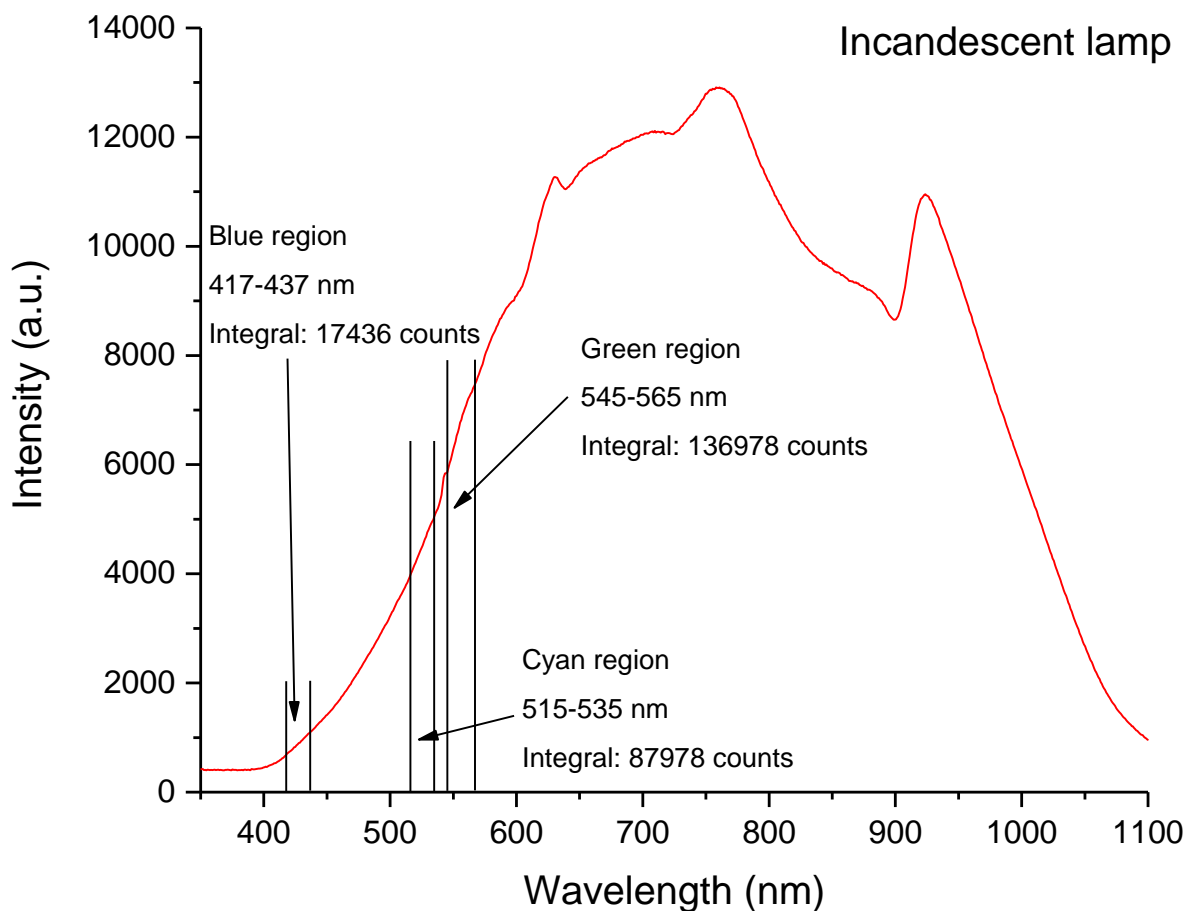

Figure S6: Emission spectrum of an incandescent lamp under which the fading of tenebrescence for  $x = 0.00$  and  $x = 0.18$  sodalites was measured. The intensities in the indicated regions were used to correct the fading curves with the relative irradiances of light of those wavelengths the sample was exposed to.

**8. XRPD and reflectance data for calcium-containing sodalites containing Cl + Br and Cl + I,  $x = 0.25$  and  $x = 0.00$ , as well as parameters obtained by Rietveld refinement for these materials.**

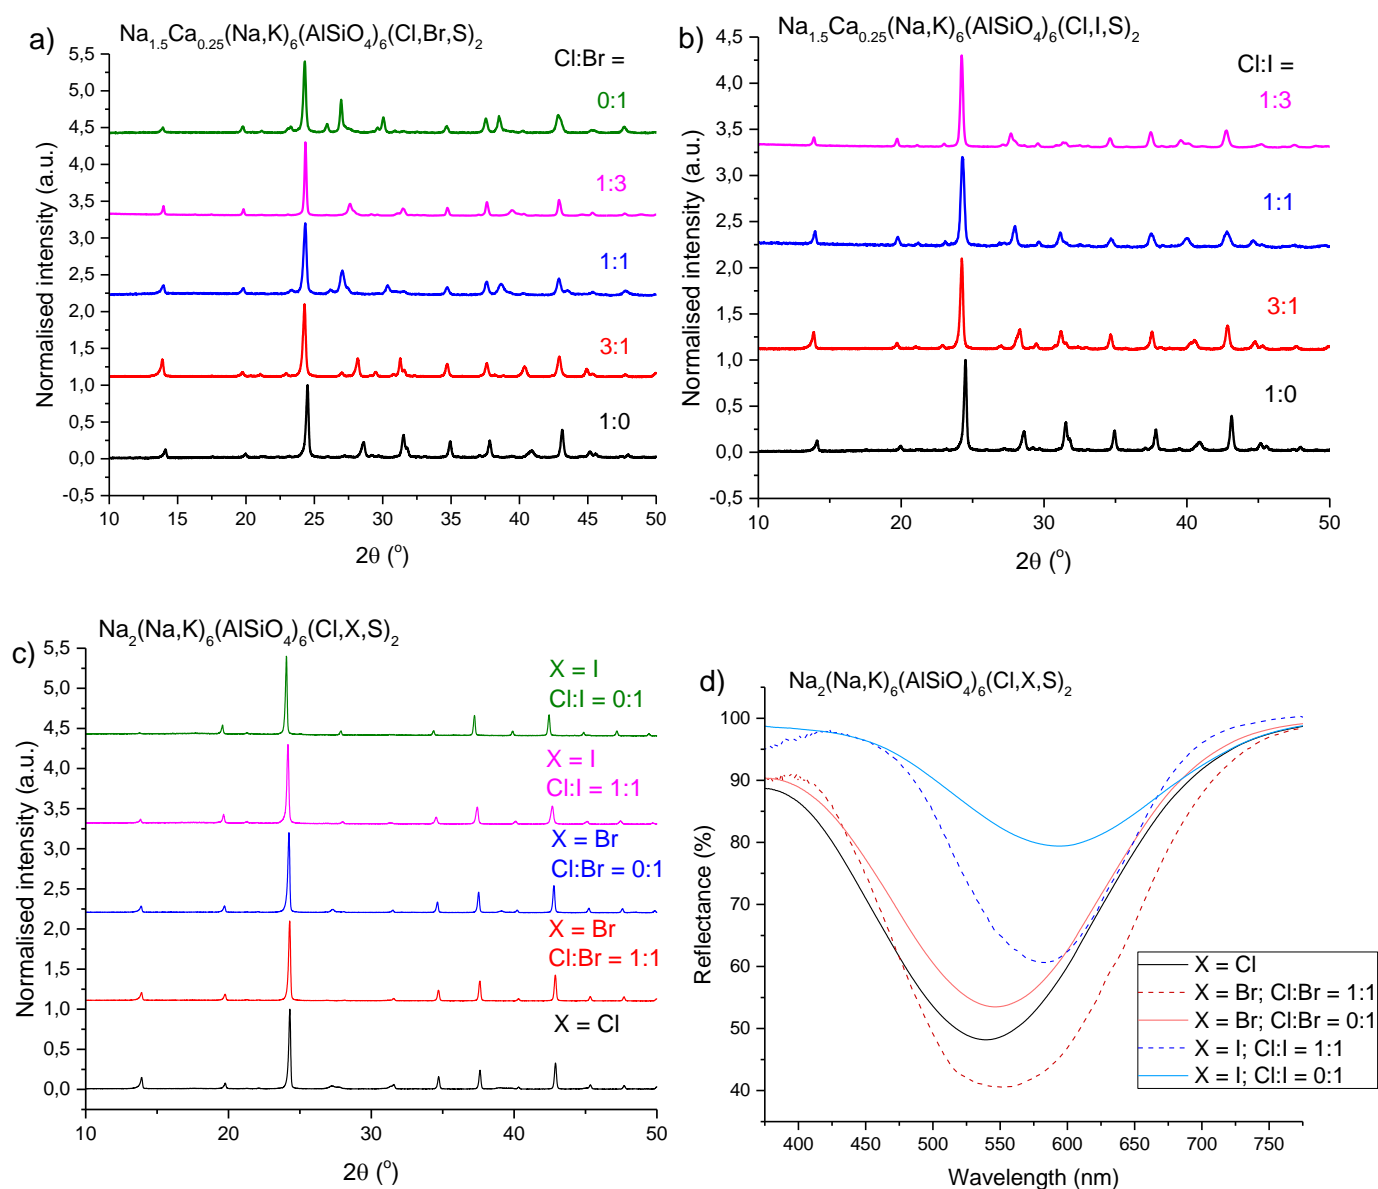

*Figure S7: a) XRD diffractograms of calcium-containing photochromic sodalites with  $x = 0.25$  and differing Cl:Br ratios. b) XRD diffractograms of calcium-containing photochromic sodalites with  $x = 0.25$  and differing Cl:I ratios. c) XRD diffractograms of photochromic sodalites with  $x = 0.00$  and differing Cl:Br and Cl:I ratios. d) Reflectance spectra of the colored forms of photochromic sodalites with  $x = 0.00$  and differing Cl:Br and Cl:I ratios.*

Table S3: Unit cell parameters and impurity contents of calcium-containing ( $x = 0.25$ ) and calcium-free ( $x = 0.00$ ) sodalites containing Cl, Br and I in varying ratios. Values obtained by Rietveld refinement.

| x    | X    | Cl:X | Sodalite (%) | Sodalite a axis (Å) | Sodalite V (Å <sup>3</sup> ) | NaCl (%) | KCl (%) | NaBr (%) | KBr (%) | K(Cl,Br) (%) | Nepheline (%) | Other phase (%) |
|------|------|------|--------------|---------------------|------------------------------|----------|---------|----------|---------|--------------|---------------|-----------------|
| 0.25 | -    | 1:0  | 71.9         | 8.907               | 706.73                       | 7.4      | 8.5     | 0.0      | 0.0     | 0.0          | 0.0           | 0.0             |
|      | Br   | 3:1  | 76.3         | 8.902               | 705.50                       | 8.3      | 0.0     | 0.0      | 0.0     | 0.0          | 11.5          | 0.0             |
|      |      | 1:1  | 76           | 8.932               | 712.58                       | 8.2      | 0.0     | 0.0      | 15.7    | 0.0          | 0.0           | 0.0             |
|      |      | 1:3  | 69.3         | 8.930               | 712.03                       | 0.0      | 0.0     | 0.0      | 0.0     | 12.5         | 0.0           | 18.2*           |
|      |      | 0:1  | 61.4         | 8.947               | 716.22                       | 0.0      | 0.0     | 0.5      | 14.7    | 0.0          | 17.0          | 6.4**           |
|      | I    | 3:1  | 71.9         | 8.915               | 708.45                       | 6.4      | 10.2    | 0.0      | 0.0     | 0.0          | 11.5          | 0.0             |
|      |      | 1:1  | 67.8         | 8.964               | 720.34                       | 9.7      | 0.0     | 0.0      | 0.0     | 11.3         | 11.3          | 0.0             |
|      |      | 1:3  | 74.8         | 8.953               | 717.60                       | 0.0      | 0.0     | 0.0      | 0.0     | 11.3         | 13.9          | 0.0             |
|      | 0.00 | -    | 1:0          | 87.1                | 8.899                        | 704.62   | 6.2     | 6.6      | 0.0     | 0.0          | 0.0           | 0.0             |
| Br   |      | 1:1  | 99.0         | 8.917               | 708.95                       | 1.0      | 0.0     | 0.0      | 0.0     | 0.0          | 0.0           | 0.0             |
|      |      | 0:1  | 96.0         | 8.934               | 713.06                       | 0.0      | 0.0     | 0.0      | 0.0     | 4.0          | 0.0           | 0.0             |
| I    |      | 1:1  | 100          | 8.957               | 718.61                       | 0.0      | 0.0     | 0.0      | 0.0     | 0.0          | 0.0           | 0.0             |
|      |      | 0:1  | 98.9         | 9.008               | 731.07                       | 1.1      | 0.0     | 0.0      | 0.0     | 0.0          | 0.0           | 0.0             |

\*  $\text{Ca}_2\text{Al}_2\text{SiO}_7$ , PDF 04-006-1869.<sup>12</sup>

\*\*  $\text{KAlSi}_3\text{O}_8$ , PDF 00-012-0703.<sup>13</sup>

## 9. Properties of different light sources used during tenebrescence fading experiments.

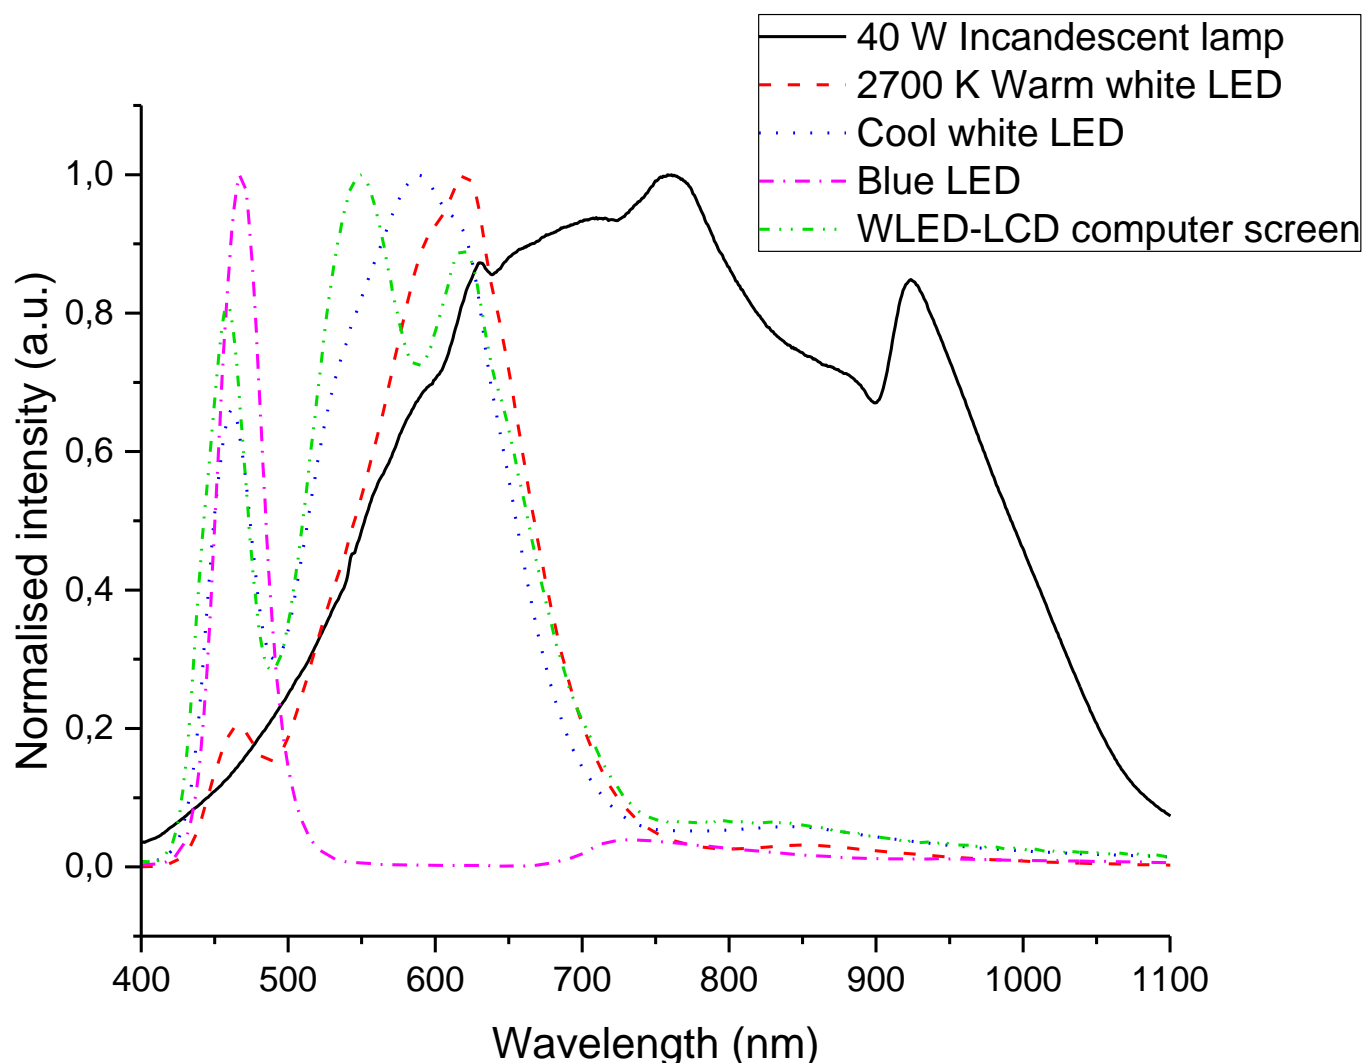

Figure S8: Normalized emission spectra of the five light sources used to measure the functionality of yellow photochromic sodalite as a blue light detector.

Table S4: Irradiances in the range 400-1050 nm for the five light sources tested, along with the proportion of blue light in the spectrum. Irradiance values were used to correct fading times for the relative doses of visible light. The blue light component is considered to be the percentage of light of wavelengths 400-480 nm compared to the entire spectrum (400-1050 nm).

| Light source             | Irradiance (mW m <sup>-2</sup> ) | Proportion of blue light in the emission spectrum (%) |
|--------------------------|----------------------------------|-------------------------------------------------------|
| 40 W Incandescent lamp   | 1340                             | 1.9                                                   |
| 2700 K Warm white LED    | 1800                             | 4.8                                                   |
| Cool white LED           | 1240                             | 12.7                                                  |
| Blue LED                 | 673                              | 64.5                                                  |
| WLED-LCD computer screen | 50                               | 14.9                                                  |

## 10. Dose-corrected fade curves before normalization.

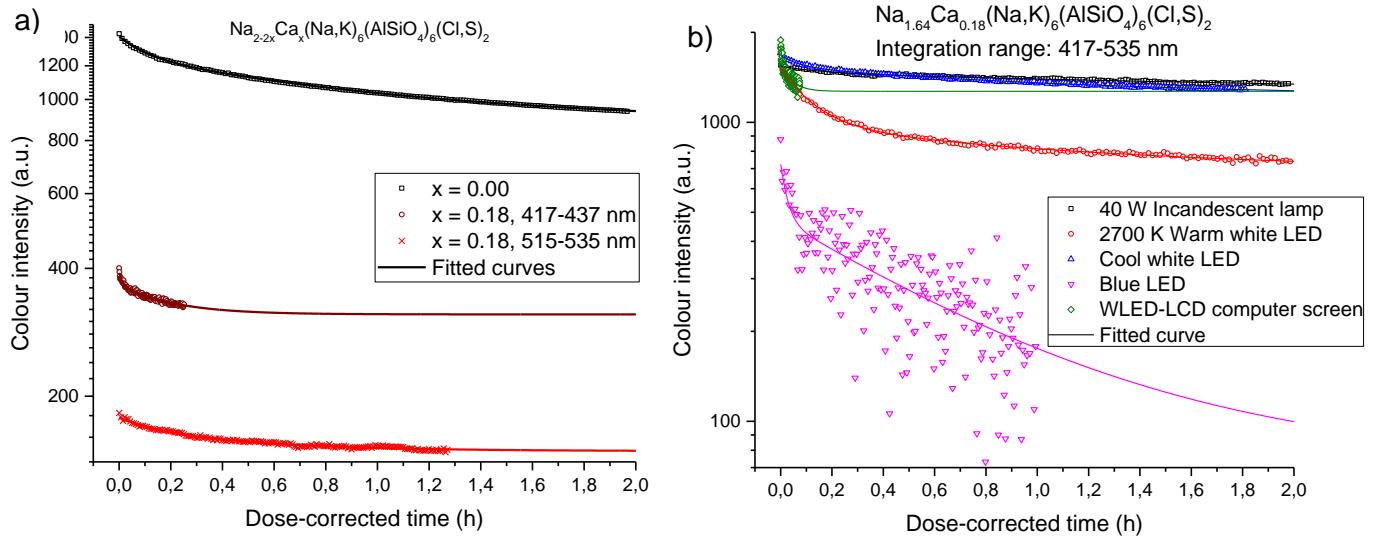

Figure S9: a) Dose-corrected coloration fade curves of  $x = 0.00$  and the pink and yellow color centers in  $x = 0.18$  under incandescent light before normalization, with fitted decay curves showing the predicted trend for up to two hours. b) Dose-corrected coloration fade curves of  $x = 0.18$  under five different light sources before normalization, with fitted decay curves showing the predicted trend for up to two hours.

## 11. Optimized supercell structures in POSCAR format

```

Na4
1.0000000000000000
17.65576151 0.00000000 0.00000000
0.00000000 17.65576151 0.00000000
0.00000000 0.00000000 17.65576151
Al Cl Na O Si Xx
48 15 64 192 48 1
Direct
1.249745366913E-01 4.999765775419E-01 -2.500254180394E-01
-1.249745366913E-01 -4.999765775419E-01 -2.500254180394E-01
1.249745366913E-01 -4.999765775419E-01 2.500254180397E-01
-1.249745366913E-01 4.999765775419E-01 2.500254180397E-01
1.249922212617E-01 -4.817345870025E-06 -2.499990370270E-01
-1.249922212617E-01 4.817345870025E-06 -2.499990370270E-01
1.249922212617E-01 4.817346153243E-06 2.499990370273E-01
-1.249922212617E-01 -4.817346153243E-06 2.499990370273E-01
2.091287549759E-06 2.499931902811E-01 3.749968575462E-01
-2.091287549759E-06 2.499931902811E-01 -3.749968575462E-01
2.091287832978E-06 -2.499931902808E-01 -3.749968575462E-01
-2.091287832978E-06 -2.499931902808E-01 3.749968575462E-01
2.499447416862E-01 3.750362449157E-01 4.999875445984E-01
-2.499447416862E-01 -3.750362449157E-01 4.999875445984E-01
2.499447416864E-01 -3.750362449157E-01 -4.999875445984E-01
-2.499447416864E-01 3.750362449157E-01 -4.999875445984E-01
2.499931902808E-01 3.749968575462E-01 2.091287832978E-06
-2.499931902808E-01 -3.749968575462E-01 2.091287832978E-06
2.499931902811E-01 -3.749968575462E-01 -2.091287549759E-06
-2.499931902811E-01 3.749968575462E-01 -2.091287549759E-06
2.499990370270E-01 -1.249922212617E-01 -4.817345870025E-06
-2.499990370270E-01 1.249922212617E-01 -4.817345870025E-06
2.499990370273E-01 1.249922212617E-01 4.817346153243E-06
-2.499990370273E-01 -1.249922212617E-01 4.817346153243E-06
2.500254180394E-01 -1.249745366913E-01 4.999765775419E-01
-2.500254180394E-01 1.249745366913E-01 4.999765775419E-01
2.500254180397E-01 1.249745366913E-01 -4.999765775419E-01
-2.500254180397E-01 -1.249745366913E-01 -4.999765775419E-01

```

3.749968575462E-01 2.091287549759E-06 2.499931902811E-01  
-3.749968575462E-01 -2.091287549759E-06 2.499931902811E-01  
3.749968575462E-01 -2.091287832978E-06 -2.499931902808E-01  
-3.749968575462E-01 2.091287832978E-06 -2.499931902808E-01  
3.750362449157E-01 -4.999875445984E-01 -2.499447416862E-01  
-3.750362449157E-01 4.999875445984E-01 -2.499447416862E-01  
3.750362449157E-01 4.999875445984E-01 2.499447416864E-01  
-3.750362449157E-01 -4.999875445984E-01 2.499447416864E-01  
4.817345870025E-06 -2.499990370270E-01 -1.249922212617E-01  
-4.817345870025E-06 -2.499990370270E-01 1.249922212617E-01  
4.817346153243E-06 2.499990370273E-01 1.249922212617E-01  
-4.817346153243E-06 2.499990370273E-01 -1.249922212617E-01  
4.999765775419E-01 -2.500254180394E-01 1.249745366913E-01  
-4.999765775419E-01 -2.500254180394E-01 -1.249745366913E-01  
4.999765775419E-01 2.500254180397E-01 -1.249745366913E-01  
-4.999765775419E-01 2.500254180397E-01 1.249745366913E-01  
4.999875445984E-01 -2.499447416862E-01 -3.750362449157E-01  
-4.999875445984E-01 -2.499447416862E-01 3.750362449157E-01  
4.999875445984E-01 2.499447416864E-01 3.750362449157E-01  
-4.999875445984E-01 2.499447416864E-01 -3.750362449157E-01  
0.000000000000E+00 0.000000000000E+00 0.000000000000E+00  
0.000000000000E+00 0.000000000000E+00 5.000000000000E-01  
0.000000000000E+00 5.000000000000E-01 0.000000000000E+00  
0.000000000000E+00 5.000000000000E-01 5.000000000000E-01  
-2.497053636278E-01 -2.497053636278E-01 -2.497053636278E-01  
-2.497053636278E-01 2.497053636284E-01 2.497053636284E-01  
2.497053636284E-01 -2.497053636278E-01 2.497053636284E-01  
2.497053636284E-01 2.497053636284E-01 -2.497053636278E-01  
-2.499145503847E-01 -2.499145503847E-01 2.499145503853E-01  
-2.499145503847E-01 2.499145503853E-01 -2.499145503847E-01  
2.499145503853E-01 -2.499145503847E-01 -2.499145503847E-01  
2.499145503853E-01 2.499145503853E-01 2.499145503853E-01  
5.000000000000E-01 0.000000000000E+00 0.000000000000E+00  
5.000000000000E-01 0.000000000000E+00 5.000000000000E-01  
5.000000000000E-01 5.000000000000E-01 0.000000000000E+00  
-1.608921362830E-01 -1.608921362830E-01 -1.608921362830E-01  
-1.608921362830E-01 1.608921362836E-01 1.608921362836E-01  
1.608921362836E-01 -1.608921362830E-01 1.608921362836E-01  
1.608921362836E-01 1.608921362836E-01 -1.608921362830E-01  
-1.610678221788E-01 -1.610706167881E-01 3.389992011643E-01  
-1.610678221788E-01 1.610706167886E-01 -3.389992011638E-01  
1.610678221794E-01 -1.610706167881E-01 -3.389992011638E-01  
1.610678221794E-01 1.610706167886E-01 3.389992011643E-01  
-1.610706167881E-01 -3.389992011638E-01 1.610678221794E-01  
-1.610706167881E-01 3.389992011643E-01 -1.610678221788E-01  
1.610706167886E-01 -3.389992011638E-01 -1.610678221788E-01  
1.610706167886E-01 3.389992011643E-01 1.610678221794E-01  
-1.610925563580E-01 -3.388951268832E-01 -3.388969937946E-01  
-1.610925563580E-01 3.388951268838E-01 3.388969937952E-01  
1.610925563585E-01 -3.388951268832E-01 3.388969937952E-01  
1.610925563585E-01 3.388951268838E-01 -3.388969937946E-01  
-3.388951268832E-01 -3.388969937946E-01 -1.610925563580E-01  
-3.388951268832E-01 3.388969937952E-01 1.610925563585E-01  
3.388951268838E-01 -3.388969937946E-01 1.610925563585E-01  
3.388951268838E-01 3.388969937952E-01 -1.610925563580E-01  
-3.388969937946E-01 -1.610925563580E-01 -3.388951268832E-01  
-3.388969937946E-01 1.610925563585E-01 3.388951268838E-01  
3.388969937952E-01 -1.610925563580E-01 3.388951268838E-01  
3.388969937952E-01 1.610925563585E-01 -3.388951268832E-01  
-3.389992011638E-01 -1.610678221788E-01 1.610706167886E-01  
-3.389992011638E-01 1.610678221794E-01 -1.610706167881E-01  
3.389992011643E-01 -1.610678221788E-01 -1.610706167881E-01  
3.389992011643E-01 1.610678221794E-01 1.610706167886E-01  
-3.391623974311E-01 -3.391623974311E-01 3.391623974317E-01  
-3.391623974311E-01 3.391623974317E-01 -3.391623974311E-01  
3.391623974317E-01 -3.391623974311E-01 -3.391623974311E-01  
3.391623974317E-01 3.391623974317E-01 3.391623974317E-01  
4.107265956185E-01 4.107265956185E-01 -4.107265956185E-01  
4.107265956185E-01 -4.107265956185E-01 4.107265956185E-01  
-4.107265956185E-01 4.107265956185E-01 4.107265956185E-01  
-4.107265956185E-01 -4.107265956185E-01 -4.107265956185E-01  
4.110421452109E-01 8.893507416195E-02 -8.893799864636E-02

4.110421452109E-01 -8.893507416195E-02 8.893799864636E-02  
-4.110421452109E-01 8.893507416195E-02 8.893799864636E-02  
-4.110421452109E-01 -8.893507416195E-02 -8.893799864636E-02  
4.110619865826E-01 8.883336321551E-02 4.110719895428E-01  
4.110619865826E-01 -8.883336321551E-02 -4.110719895428E-01  
-4.110619865826E-01 8.883336321551E-02 -4.110719895428E-01  
-4.110619865826E-01 -8.883336321551E-02 4.110719895428E-01  
4.110719895428E-01 4.110619865826E-01 8.883336321551E-02  
4.110719895428E-01 -4.110619865826E-01 -8.883336321551E-02  
-4.110719895428E-01 4.110619865826E-01 -8.883336321551E-02  
-4.110719895428E-01 -4.110619865826E-01 8.883336321551E-02  
8.883336321551E-02 4.110719895428E-01 4.110619865826E-01  
8.883336321551E-02 -4.110719895428E-01 -4.110619865826E-01  
-8.883336321551E-02 4.110719895428E-01 -4.110619865826E-01  
-8.883336321551E-02 -4.110719895428E-01 4.110619865826E-01  
8.893507416195E-02 8.893799864636E-02 -4.110421452109E-01  
8.893507416195E-02 -8.893799864636E-02 4.110421452109E-01  
-8.893507416195E-02 8.893799864636E-02 4.110421452109E-01  
-8.893507416195E-02 -8.893799864636E-02 -4.110421452109E-01  
8.893799864636E-02 4.110421452109E-01 8.893507416195E-02  
8.893799864636E-02 4.110421452109E-01 8.893507416195E-02  
-8.893799864636E-02 -4.110421452109E-01 -8.893507416195E-02  
8.894359783462E-02 8.894359783462E-02 8.894359783462E-02  
8.894359783462E-02 -8.894359783462E-02 -8.894359783462E-02  
-8.894359783462E-02 8.894359783462E-02 -8.894359783462E-02  
-8.894359783462E-02 -8.894359783462E-02 8.894359783462E-02  
-1.752077422002E-01 -3.198934073376E-01 -4.668417679996E-01  
-1.752077422002E-01 3.198934073382E-01 4.668417680002E-01  
1.752077422008E-01 -3.198934073376E-01 4.668417680002E-01  
1.752077422008E-01 3.198934073382E-01 -4.668417679996E-01  
-1.753043504717E-01 -1.801849282425E-01 -3.307661058186E-02  
-1.753043504717E-01 1.801849282431E-01 3.307661058242E-02  
1.753043504722E-01 -1.801849282425E-01 3.307661058242E-02  
1.753043504722E-01 1.801849282431E-01 -3.307661058186E-02  
-1.753149803606E-01 -3.197952987078E-01 3.311361217571E-02  
-1.753149803606E-01 3.197952987083E-01 -3.311361217514E-02  
1.753149803612E-01 -3.197952987078E-01 -3.311361217514E-02  
1.753149803612E-01 3.197952987083E-01 3.311361217571E-02  
-1.754023998638E-01 -1.802812196744E-01 4.669376686841E-01  
-1.754023998638E-01 1.802812196749E-01 -4.669376686835E-01  
1.754023998644E-01 -1.802812196744E-01 -4.669376686835E-01  
1.754023998644E-01 1.802812196749E-01 4.669376686841E-01  
-1.799942747061E-01 -4.668360679991E-01 -3.248252005524E-01  
-1.799942747061E-01 4.668360679997E-01 3.248252005530E-01  
1.799942747067E-01 -4.668360679991E-01 3.248252005530E-01  
1.799942747067E-01 4.668360679997E-01 -3.248252005524E-01  
-1.801849282425E-01 -3.307661058186E-02 -1.753043504717E-01  
-1.801849282425E-01 3.307661058242E-02 1.753043504722E-01  
1.801849282431E-01 -3.307661058186E-02 1.753043504722E-01  
1.801849282431E-01 3.307661058242E-02 -1.753043504717E-01  
-1.801892010409E-01 -3.311743845680E-02 3.246754984171E-01  
-1.801892010409E-01 3.311743845736E-02 -3.246754984165E-01  
1.801892010415E-01 -3.311743845680E-02 -3.246754984165E-01  
1.801892010415E-01 3.311743845736E-02 3.246754984171E-01  
-1.802812196744E-01 -4.669376686835E-01 1.754023998644E-01  
-1.802812196744E-01 4.669376686841E-01 -1.754023998638E-01  
1.802812196749E-01 -4.669376686835E-01 -1.754023998638E-01  
1.802812196749E-01 4.669376686841E-01 1.754023998644E-01  
2.166831921868E-01 4.304276617067E-01 4.255385829786E-01  
2.166831921868E-01 -4.304276617067E-01 -4.255385829786E-01  
-2.166831921868E-01 4.304276617067E-01 -4.255385829786E-01  
-2.166831921868E-01 -4.304276617067E-01 4.255385829786E-01  
2.168572103646E-01 6.977643803386E-02 -4.253183545017E-01  
2.168572103646E-01 -6.977643803386E-02 4.253183545017E-01  
-2.168572103646E-01 6.977643803386E-02 4.253183545017E-01  
-2.168572103646E-01 -6.977643803386E-02 -4.253183545017E-01  
2.168705001791E-01 4.302180173800E-01 -7.466277710929E-02  
2.168705001791E-01 -4.302180173800E-01 7.466277710929E-02  
-2.168705001791E-01 4.302180173800E-01 7.466277710929E-02  
-2.168705001791E-01 -4.302180173800E-01 -7.466277710929E-02  
2.168884550031E-01 6.979191773907E-02 7.467461265127E-02

2.168884550031E-01 -6.979191773907E-02 -7.467461265127E-02  
-2.168884550031E-01 6.979191773907E-02 -7.467461265127E-02  
-2.168884550031E-01 -6.979191773907E-02 7.467461265127E-02  
2.830505371438E-01 4.298889663572E-01 -4.249881694234E-01  
2.830505371438E-01 -4.298889663572E-01 4.249881694234E-01  
-2.830505371438E-01 4.298889663572E-01 4.249881694234E-01  
-2.830505371438E-01 -4.298889663572E-01 -4.249881694234E-01  
2.830869797023E-01 6.979631295081E-02 4.253040281348E-01  
2.830869797023E-01 -6.979631295081E-02 -4.253040281348E-01  
-2.830869797023E-01 6.979631295081E-02 -4.253040281348E-01  
-2.830869797023E-01 -6.979631295081E-02 4.253040281348E-01  
2.830944747323E-01 4.301921640075E-01 7.469376318184E-02  
2.830944747323E-01 -4.301921640075E-01 -7.469376318184E-02  
-2.830944747323E-01 4.301921640075E-01 -7.469376318184E-02  
-2.830944747323E-01 -4.301921640075E-01 7.469376318184E-02  
2.830956346193E-01 6.979711777049E-02 -7.468761436933E-02  
2.830956346193E-01 -6.979711777049E-02 7.468761436933E-02  
-2.830956346193E-01 6.979711777049E-02 7.468761436933E-02  
-2.830956346193E-01 -6.979711777049E-02 -7.468761436933E-02  
-3.192078005815E-01 -4.667803171168E-01 3.241250178689E-01  
-3.192078005815E-01 4.667803171173E-01 -3.241250178683E-01  
3.192078005820E-01 -4.667803171168E-01 -3.241250178683E-01  
3.192078005820E-01 4.667803171173E-01 3.241250178689E-01  
-3.197750704897E-01 -3.311031288503E-02 -3.246606855711E-01  
-3.197750704897E-01 3.311031288560E-02 3.246606855717E-01  
3.197750704903E-01 -3.311031288503E-02 3.246606855717E-01  
3.197750704903E-01 3.311031288560E-02 -3.246606855711E-01  
-3.197952987078E-01 -3.311361217514E-02 1.753149803612E-01  
-3.197952987078E-01 3.311361217517E-02 -1.753149803606E-01  
3.197952987083E-01 -3.311361217514E-02 -1.753149803606E-01  
3.197952987083E-01 3.311361217517E-02 1.753149803612E-01  
-3.198934073376E-01 -4.668417679996E-01 -1.752077422002E-01  
-3.198934073376E-01 4.668417680002E-01 1.752077422008E-01  
3.198934073382E-01 -4.668417679996E-01 1.752077422008E-01  
3.198934073382E-01 4.668417680002E-01 -1.752077422002E-01  
-3.241250178683E-01 -3.192078005815E-01 4.667803171173E-01  
-3.241250178683E-01 3.192078005820E-01 -4.667803171168E-01  
3.241250178689E-01 -3.192078005815E-01 -4.667803171168E-01  
3.241250178689E-01 3.192078005820E-01 4.667803171173E-01  
-3.246606855711E-01 -3.197750704897E-01 -3.311031288503E-02  
-3.246606855711E-01 3.197750704903E-01 3.311031288560E-02  
3.246606855717E-01 -3.197750704897E-01 3.311031288560E-02  
3.246606855717E-01 3.197750704903E-01 -3.311031288503E-02  
-3.246754984165E-01 -1.801892010409E-01 3.311743845736E-02  
-3.246754984165E-01 1.801892010415E-01 -3.311743845680E-02  
3.246754984171E-01 -1.801892010409E-01 -3.311743845680E-02  
3.246754984171E-01 1.801892010415E-01 3.311743845736E-02  
-3.248252005524E-01 -1.799942747061E-01 -4.668360679991E-01  
-3.248252005524E-01 1.799942747067E-01 4.668360679997E-01  
3.248252005530E-01 -1.799942747061E-01 4.668360679997E-01  
3.248252005530E-01 1.799942747067E-01 -4.668360679991E-01  
-3.307661058186E-02 -1.753043504717E-01 -1.801849282425E-01  
-3.307661058186E-02 1.753043504722E-01 1.801849282431E-01  
3.307661058242E-02 -1.753043504717E-01 1.801849282431E-01  
3.307661058242E-02 1.753043504722E-01 -1.801849282425E-01  
-3.311031288503E-02 -3.246606855711E-01 -3.197750704897E-01  
-3.311031288503E-02 3.246606855717E-01 3.197750704903E-01  
3.311031288560E-02 -3.246606855711E-01 3.197750704903E-01  
3.311031288560E-02 3.246606855717E-01 -3.197750704897E-01  
-3.311361217514E-02 -1.753149803606E-01 3.197952987083E-01  
-3.311361217514E-02 1.753149803612E-01 -3.197952987078E-01  
3.311361217517E-02 -1.753149803606E-01 -3.197952987078E-01  
3.311361217517E-02 1.753149803612E-01 3.197952987083E-01  
-3.311743845680E-02 -3.246754984165E-01 1.801892010415E-01  
-3.311743845680E-02 3.246754984171E-01 -1.801892010409E-01  
3.311743845736E-02 -3.246754984165E-01 -1.801892010409E-01  
3.311743845736E-02 3.246754984171E-01 1.801892010415E-01  
4.249881694234E-01 2.830505371438E-01 -4.298889663572E-01  
4.249881694234E-01 -2.830505371438E-01 4.298889663572E-01  
-4.249881694234E-01 2.830505371438E-01 4.298889663572E-01  
-4.249881694234E-01 -2.830505371438E-01 -4.298889663572E-01  
4.253040281348E-01 2.830869797023E-01 6.979631295081E-02



4.253040281348E-01 -2.830869797023E-01 -6.979631295081E-02  
-4.253040281348E-01 2.830869797023E-01 -6.979631295081E-02  
-4.253040281348E-01 -2.830869797023E-01 6.979631295081E-02  
4.253183545017E-01 2.168572103646E-01 -6.977643803386E-02  
4.253183545017E-01 -2.168572103646E-01 6.977643803386E-02  
-4.253183545017E-01 2.168572103646E-01 6.977643803386E-02  
-4.253183545017E-01 -2.168572103646E-01 -6.977643803386E-02  
4.255385829786E-01 2.166831921868E-01 4.304276617067E-01  
4.255385829786E-01 -2.166831921868E-01 -4.304276617067E-01  
-4.255385829786E-01 2.166831921868E-01 -4.304276617067E-01  
-4.255385829786E-01 -2.166831921868E-01 4.304276617067E-01  
4.298889663572E-01 4.249881694234E-01 -2.830505371438E-01  
4.298889663572E-01 -4.249881694234E-01 2.830505371438E-01  
-4.298889663572E-01 4.249881694234E-01 2.830505371438E-01  
-4.298889663572E-01 -4.249881694234E-01 -2.830505371438E-01  
4.301921640075E-01 7.469376318184E-02 2.830944747323E-01  
4.301921640075E-01 -7.469376318184E-02 -2.830944747323E-01  
-4.301921640075E-01 7.469376318184E-02 -2.830944747323E-01  
-4.301921640075E-01 -7.469376318184E-02 2.830944747323E-01  
4.302180173800E-01 7.466277710929E-02 -2.168705001791E-01  
4.302180173800E-01 -7.466277710929E-02 2.168705001791E-01  
-4.302180173800E-01 7.466277710929E-02 2.168705001791E-01  
-4.302180173800E-01 -7.466277710929E-02 -2.168705001791E-01  
4.304276617067E-01 4.255385829786E-01 2.166831921868E-01  
4.304276617067E-01 -4.255385829786E-01 -2.166831921868E-01  
-4.304276617067E-01 4.255385829786E-01 -2.166831921868E-01  
-4.304276617067E-01 -4.255385829786E-01 2.166831921868E-01  
-4.667803171168E-01 -3.241250178683E-01 3.192078005820E-01  
-4.667803171168E-01 3.241250178689E-01 -3.192078005815E-01  
4.667803171173E-01 -3.241250178683E-01 -3.192078005815E-01  
4.667803171173E-01 3.241250178689E-01 3.192078005820E-01  
-4.668360679991E-01 -3.248252005524E-01 -1.799942747061E-01  
-4.668360679991E-01 3.248252005530E-01 1.799942747067E-01  
4.668360679997E-01 -3.248252005524E-01 1.799942747067E-01  
4.668360679997E-01 3.248252005530E-01 -1.799942747061E-01  
-4.668417679996E-01 -1.752077422002E-01 -3.198934073376E-01  
-4.668417679996E-01 1.752077422008E-01 3.198934073382E-01  
4.668417680002E-01 -1.752077422002E-01 3.198934073382E-01  
4.668417680002E-01 1.752077422008E-01 -3.198934073376E-01  
-4.669376686835E-01 -1.754023998638E-01 1.802812196749E-01  
-4.669376686835E-01 1.754023998644E-01 -1.802812196744E-01  
4.669376686841E-01 -1.754023998638E-01 -1.802812196744E-01  
4.669376686841E-01 1.754023998644E-01 1.802812196749E-01  
6.977643803386E-02 4.253183545017E-01 -2.168572103646E-01  
6.977643803386E-02 -4.253183545017E-01 2.168572103646E-01  
-6.977643803386E-02 4.253183545017E-01 2.168572103646E-01  
-6.977643803386E-02 -4.253183545017E-01 -2.168572103646E-01  
6.979191773907E-02 7.467461265127E-02 2.168884550031E-01  
6.979191773907E-02 -7.467461265127E-02 -2.168884550031E-01  
-6.979191773907E-02 7.467461265127E-02 -2.168884550031E-01  
-6.979191773907E-02 -7.467461265127E-02 2.168884550031E-01  
6.979631295081E-02 4.253040281348E-01 2.830869797023E-01  
6.979631295081E-02 -4.253040281348E-01 -2.830869797023E-01  
-6.979631295081E-02 4.253040281348E-01 -2.830869797023E-01  
6.979711777049E-02 7.468761436933E-02 -2.830956346193E-01  
6.979711777049E-02 -7.468761436933E-02 2.830956346193E-01  
-6.979711777049E-02 7.468761436933E-02 2.830956346193E-01  
-6.979711777049E-02 -7.468761436933E-02 -2.830956346193E-01  
7.466277710929E-02 2.168705001791E-01 -4.302180173800E-01  
7.466277710929E-02 -2.168705001791E-01 4.302180173800E-01  
-7.466277710929E-02 2.168705001791E-01 4.302180173800E-01  
-7.466277710929E-02 -2.168705001791E-01 -4.302180173800E-01  
7.467461265127E-02 2.168884550031E-01 6.979191773907E-02  
7.467461265127E-02 -2.168884550031E-01 -6.979191773907E-02  
-7.467461265127E-02 2.168884550031E-01 -6.979191773907E-02  
-7.467461265127E-02 -2.168884550031E-01 6.979191773907E-02  
7.468761436933E-02 2.830956346193E-01 -6.979711777049E-02  
7.468761436933E-02 -2.830956346193E-01 6.979711777049E-02  
-7.468761436933E-02 2.830956346193E-01 6.979711777049E-02  
-7.468761436933E-02 -2.830956346193E-01 -6.979711777049E-02  
7.469376318184E-02 2.830944747323E-01 4.301921640075E-01

7.469376318184E-02 -2.830944747323E-01 -4.301921640075E-01  
-7.469376318184E-02 2.830944747323E-01 -4.301921640075E-01  
-7.469376318184E-02 -2.830944747323E-01 4.301921640075E-01  
1.249990612444E-01 -2.499983199758E-01 -8.937088787195E-06  
-1.249990612444E-01 2.499983199758E-01 -8.937088787195E-06  
1.249990612444E-01 2.499983199760E-01 8.937089070414E-06  
-1.249990612444E-01 -2.499983199760E-01 8.937089070414E-06  
1.250009776541E-01 -2.500356646004E-01 4.999747983720E-01  
-1.250009776541E-01 2.500356646004E-01 4.999747983720E-01  
1.250009776541E-01 2.500356646007E-01 -4.999747983720E-01  
-1.250009776541E-01 -2.500356646007E-01 -4.999747983720E-01  
2.498894638800E-01 -4.999926101130E-01 3.750221889133E-01  
-2.498894638800E-01 -4.999926101130E-01 -3.750221889133E-01  
2.498894638803E-01 4.999926101130E-01 -3.750221889133E-01  
-2.498894638803E-01 4.999926101130E-01 3.750221889133E-01  
2.499839755397E-01 8.985728496007E-07 3.749842764589E-01  
-2.499839755397E-01 8.985728496007E-07 -3.749842764589E-01  
2.499839755400E-01 -8.985725663824E-07 -3.749842764589E-01  
-2.499839755400E-01 -8.985725663824E-07 3.749842764589E-01  
2.499983199758E-01 -8.937088787195E-06 -1.249990612444E-01  
-2.499983199758E-01 -8.937088787195E-06 1.249990612444E-01  
2.499983199760E-01 8.937089070414E-06 1.249990612444E-01  
-2.499983199760E-01 8.937089070414E-06 -1.249990612444E-01  
2.500356646004E-01 4.999747983720E-01 -1.250009776541E-01  
-2.500356646004E-01 4.999747983720E-01 1.250009776541E-01  
2.500356646007E-01 -4.999747983720E-01 1.250009776541E-01  
-2.500356646007E-01 -4.999747983720E-01 -1.250009776541E-01  
3.749842764589E-01 2.499839755397E-01 8.985728496007E-07  
-3.749842764589E-01 -2.499839755397E-01 8.985728496007E-07  
3.749842764589E-01 -2.499839755400E-01 -8.985725663824E-07  
-3.749842764589E-01 2.499839755400E-01 -8.985725663824E-07  
3.750221889133E-01 2.498894638800E-01 -4.999926101130E-01  
-3.750221889133E-01 -2.498894638800E-01 -4.999926101130E-01  
3.750221889133E-01 -2.498894638803E-01 4.999926101130E-01  
-3.750221889133E-01 2.498894638803E-01 4.999926101130E-01  
4.999747983720E-01 1.250009776541E-01 -2.500356646004E-01  
-4.999747983720E-01 -1.250009776541E-01 -2.500356646004E-01  
4.999747983720E-01 -1.250009776541E-01 2.500356646007E-01  
-4.999747983720E-01 1.250009776541E-01 2.500356646007E-01  
4.999926101130E-01 3.750221889133E-01 -2.498894638800E-01  
-4.999926101130E-01 -3.750221889133E-01 -2.498894638800E-01  
4.999926101130E-01 -3.750221889133E-01 2.498894638803E-01  
-4.999926101130E-01 3.750221889133E-01 2.498894638803E-01  
8.937088787195E-06 -1.249990612444E-01 -2.499983199758E-01  
-8.937088787195E-06 1.249990612444E-01 -2.499983199758E-01  
8.937089070414E-06 1.249990612444E-01 2.499983199760E-01  
-8.937089070414E-06 -1.249990612444E-01 2.499983199760E-01  
8.985725663824E-07 3.749842764589E-01 2.499839755400E-01  
-8.985725663824E-07 -3.749842764589E-01 2.499839755400E-01  
8.985728496007E-07 -3.749842764589E-01 -2.499839755397E-01  
-8.985728496007E-07 3.749842764589E-01 -2.499839755397E-01  
5.000000000000E-01 5.000000000000E-01 5.000000000000E-01

Na2Ca

1.00000000000000

17.65576151 0.00000000 0.00000000

0.00000000 17.65576151 0.00000000

0.00000000 0.00000000 17.65576151

Al Ca Cl Na O Si Xx

49 1 15 63 192 47 1

Direct

1.201436291256E-01 4.974871256404E-01 2.499419777084E-01

1.205935360266E-01 -2.199569912046E-03 -2.499775133873E-01

1.207514700357E-01 -2.269393669859E-03 2.499745644024E-01

1.211413925252E-01 4.970831735652E-01 -2.496410306578E-01

-1.287144640370E-01 4.972617434952E-01 -2.488332135128E-01

-1.288834407812E-01 -2.025669561020E-03 2.498007922529E-01

-1.292485983082E-01 4.970635535531E-01 2.497995730190E-01

-1.295212748438E-01 -2.233908055851E-03 -2.494787153196E-01  
2.444059136109E-01 -3.780390508356E-01 4.999192795938E-01  
2.444864167754E-01 -3.777090403207E-01 -8.134677352897E-04  
2.445792268798E-01 -1.266794214653E-01 -4.993404270340E-01  
2.452810677948E-01 3.720453188383E-01 -1.946314021735E-04  
2.453585663914E-01 -1.272379411567E-01 4.152413239709E-04  
2.453592690682E-01 1.226684382419E-01 2.595960950792E-04  
2.459642599421E-01 3.729324908615E-01 -4.990193918391E-01  
2.465691895161E-01 1.230993624162E-01 -4.997563892740E-01  
-2.530684220642E-01 3.719642704487E-01 -4.987125037810E-01  
-2.533116883468E-01 -3.793924068859E-01 4.983962400380E-01  
-2.542164987377E-01 1.234584324185E-01 -4.999735359218E-01  
-2.542958670456E-01 -3.773065820050E-01 8.030599410744E-05  
-2.546245171488E-01 -1.268531046440E-01 -4.967776971441E-01  
-2.546663146604E-01 3.725391800852E-01 1.432012293067E-04  
-2.548700268347E-01 1.224974260044E-01 2.697243965444E-04  
-2.549499366932E-01 -1.275474673875E-01 6.486076658431E-04  
3.685180879431E-01 4.942436067548E-01 2.466420361125E-01  
3.703777097315E-01 -2.022730467840E-03 -2.490683443669E-01  
3.705032773380E-01 -1.034808588662E-03 2.496892518813E-01  
3.705381747428E-01 4.973785378570E-01 -2.490360386581E-01  
-3.786311794649E-01 4.990237119528E-01 2.515081327970E-01  
-3.790412830474E-01 -3.029908307203E-03 -2.507639324254E-01  
-3.798767683254E-01 -2.529015837318E-01 4.992229950993E-01  
-3.799426068198E-01 4.983413552387E-01 -2.498289582230E-01  
-3.802934133319E-01 -3.578597828408E-03 2.515062786845E-01  
-4.004207154892E-03 2.470447951784E-01 -3.745551463294E-01  
-4.006748590353E-03 2.473596393425E-01 3.752570839045E-01  
-4.404846727520E-03 2.474970221422E-01 1.252922982023E-01  
-4.518467485662E-03 -2.516682689224E-01 -1.248691404240E-01  
-4.602548376185E-03 2.474381960566E-01 -1.244344733205E-01  
-4.634821965479E-03 -2.526670231356E-01 1.253114197034E-01  
-4.654962691826E-03 -2.534156939291E-01 -3.745657149398E-01  
4.934097544023E-01 -2.542978118294E-01 -3.735047761474E-01  
4.950253917036E-01 -2.518117549969E-01 1.248988948542E-01  
4.956283426721E-01 -2.526556103515E-01 -1.240416480441E-01  
4.956749544770E-01 2.475285957543E-01 -1.251551637003E-01  
4.958311921264E-01 -2.484552851106E-01 3.735893296703E-01  
4.961085674631E-01 2.479915041180E-01 -3.750564989714E-01  
4.964823879363E-01 2.483240374243E-01 3.751275749783E-01  
4.968443820228E-01 2.476241967929E-01 1.252309888629E-01  
-5.442627151731E-03 -2.510556768135E-01 3.749704551531E-01  
4.107266059237E-01 -4.107265781707E-01 4.098770248964E-01  
-2.017356914529E-03 4.971638372341E-01 -4.994517852160E-01  
-2.347883950806E-03 -1.964949775385E-03 -4.999858987267E-01  
2.439978462267E-01 -2.517715385864E-01 -2.502960386659E-01  
2.454261805355E-01 -2.545009228171E-01 2.511669216994E-01  
2.455361592773E-01 2.468729183039E-01 -2.496454893594E-01  
2.459356887830E-01 2.485668466633E-01 2.502173617523E-01  
-2.537555576236E-01 -2.527528669228E-01 -2.480244350671E-01  
-2.542410325960E-01 2.478486531979E-01 -2.485853829359E-01  
-2.543964461568E-01 2.472604501519E-01 2.493730431991E-01  
-2.551986166949E-01 -2.529295540983E-01 2.490700717440E-01  
-4.740125152994E-03 -2.405631519465E-03 6.169205912815E-05  
-4.822542012251E-03 4.973419370420E-01 4.458674039309E-04  
4.941411383437E-01 -1.485940642100E-03 -4.995675236327E-01  
4.956737990784E-01 -2.006858791191E-03 -3.711906528314E-04  
4.959619466815E-01 4.975235175111E-01 1.822121416956E-03  
1.535756799832E-01 -3.405002952380E-01 3.382382116545E-01  
1.553659870263E-01 -1.623695728044E-01 -3.382103092612E-01  
1.560684231180E-01 -3.414475023819E-01 -1.617410508228E-01  
1.562659703803E-01 3.358333131338E-01 -3.376616491662E-01  
1.562932773237E-01 3.356627467805E-01 1.609111590971E-01  
1.562997753847E-01 1.582822283262E-01 -1.609673869372E-01  
1.563430453646E-01 -1.636503684120E-01 1.616762281250E-01  
1.571276828490E-01 1.588625534519E-01 3.393852045063E-01  
-1.652523356012E-01 3.365249527871E-01 -1.604491442953E-01  
-1.654530163557E-01 1.582923667443E-01 1.610379586581E-01  
-1.657684229269E-01 -1.634805112968E-01 -1.604915955895E-01  
-1.658107971856E-01 3.353473499995E-01 3.391466943611E-01  
-1.661316282525E-01 -3.410282523012E-01 1.611840295409E-01  
-1.661602251581E-01 1.592565709232E-01 -3.385361774639E-01

-1.667711237254E-01 -3.414828531348E-01 -3.399885595574E-01  
-1.683649368769E-01 -1.631223000781E-01 3.420127562946E-01  
3.320860421888E-01 -1.625308346112E-01 3.391172598671E-01  
3.333712671741E-01 -3.397615000487E-01 -3.387934495860E-01  
3.334357299943E-01 -3.405027145803E-01 1.595540814001E-01  
3.347338337988E-01 3.352792944485E-01 -1.609360414507E-01  
3.347791815871E-01 -1.632904809275E-01 -1.615228421886E-01  
3.351837896779E-01 1.584297381891E-01 -3.383435828069E-01  
3.355963473593E-01 1.594819843473E-01 1.614241288724E-01  
3.358829211444E-01 3.340521889970E-01 3.397107288256E-01  
-3.413382667016E-01 3.375051830560E-01 1.605498692666E-01  
-3.418573855139E-01 1.571757236477E-01 3.390054958958E-01  
-3.418844382432E-01 3.368556397817E-01 -3.379871609375E-01  
-3.428751875969E-01 1.572978495226E-01 -1.613299568286E-01  
-3.429981774038E-01 -1.629448398560E-01 1.616648387580E-01  
-3.431430008650E-01 -3.409958640568E-01 -1.606474661896E-01  
-3.457160491200E-01 -1.650405159465E-01 -3.398787983410E-01  
-3.474193864867E-01 -3.372787415409E-01 3.428006759283E-01  
4.059977253876E-01 4.070070580160E-01 8.586083242578E-02  
4.064799457947E-01 8.651252865978E-02 -8.889441479277E-02  
4.069487946248E-01 -9.111019140673E-02 8.790510542346E-02  
4.071644754929E-01 8.720674572443E-02 4.115850710893E-01  
4.071747947522E-01 -4.134880710064E-01 -8.705159286084E-02  
4.080019302906E-01 -9.112780122445E-02 -4.088036380492E-01  
-4.107265781707E-01 -4.107265781707E-01 -4.107265781707E-01  
-4.107265781707E-01 4.107266059237E-01 4.107266059237E-01  
4.107266059237E-01 4.107266059237E-01 -4.107265781707E-01  
-4.108208115361E-01 -9.234395805643E-02 4.153015457280E-01  
-4.140885744233E-01 -4.134917713175E-01 8.903746686079E-02  
-4.150610122172E-01 8.577318372289E-02 -4.110092015110E-01  
-4.154365865415E-01 4.089451358420E-01 -8.870084089531E-02  
-4.157164469691E-01 -9.140910176563E-02 -8.975912597011E-02  
-4.157492948868E-01 8.566437470998E-02 9.039660766085E-02  
8.262241609594E-02 -4.130551510662E-01 8.940330105493E-02  
8.353227591944E-02 -4.135476333227E-01 -4.093749875154E-01  
8.369387972284E-02 4.083751067276E-01 -8.859180306293E-02  
8.387423630631E-02 4.074959516451E-01 4.118045843428E-01  
8.394548285598E-02 -9.073609930073E-02 -8.952648229707E-02  
8.399124170459E-02 8.621611471364E-02 8.881180358158E-02  
8.449386527336E-02 -9.095782107327E-02 4.105117768183E-01  
8.529052203187E-02 8.641026832915E-02 -4.104447783538E-01  
-9.111439510155E-02 -4.119855155232E-01 4.128894017464E-01  
-9.203738836241E-02 4.086113048004E-01 -4.103371273827E-01  
-9.251326685863E-02 -9.226328905063E-02 -4.123553413161E-01  
-9.341051937347E-02 8.546424329924E-02 4.112603198933E-01  
-9.355417968253E-02 -4.128340945989E-01 -8.809192965445E-02  
-9.405171922311E-02 4.084717767380E-01 8.910364203979E-02  
-9.417622026272E-02 8.608538071524E-02 -8.869353785064E-02  
-9.435339715153E-02 -9.117130279567E-02 8.848931711870E-02  
1.701285763648E-01 -1.823614025359E-01 -4.662569808087E-01  
1.702789044002E-01 -3.220412576279E-01 -3.400671414449E-02  
1.708222268971E-01 1.778373095774E-01 -3.326493717137E-02  
1.708231980854E-01 3.184573414810E-01 -4.661093266153E-01  
1.711794881762E-01 3.167209722601E-01 3.357410303015E-02  
1.713384009038E-01 -1.832187255311E-01 3.387117428954E-02  
1.716038319646E-01 -3.215105647446E-01 4.665503035261E-01  
1.724634954294E-01 1.791320306465E-01 4.672171051860E-01  
1.747544606797E-01 4.639244470833E-01 1.750204337882E-01  
1.754778872894E-01 3.067160108357E-02 -1.749436356707E-01  
1.758523390239E-01 3.110003872092E-02 3.247403884538E-01  
1.758900565067E-01 -3.498703301668E-02 -3.248096052273E-01  
1.761521807959E-01 -3.586978865157E-02 1.756279210144E-01  
1.761957714215E-01 -4.692687877755E-01 -1.751810012952E-01  
1.765365669459E-01 4.640505636401E-01 -3.245483214857E-01  
1.772469159060E-01 -4.690200055202E-01 3.237088228823E-01  
-1.780730079502E-01 -3.243445668745E-01 -4.672349667181E-01  
-1.788927097403E-01 3.168999860229E-01 4.669195215906E-01  
-1.791565313751E-01 -1.819098252647E-01 4.691244579816E-01  
-1.792733571168E-01 1.781822280194E-01 -4.662764482559E-01  
-1.796558175036E-01 3.176205396586E-01 -3.271272746878E-02  
-1.796562478096E-01 -3.221134468635E-01 3.319082615206E-02  
-1.798606825821E-01 -1.822992822586E-01 -3.242768418703E-02

-1.802619342517E-01 1.779838508287E-01 3.344683066596E-02  
-1.833533811363E-01 -3.460888499624E-02 3.248761010508E-01  
-1.834781300055E-01 -4.692210420175E-01 1.745579003263E-01  
-1.838504318114E-01 -4.699643924005E-01 -3.233400535433E-01  
-1.838899795608E-01 -3.582553238033E-02 -1.741833042645E-01  
-1.846802440310E-01 4.640859487209E-01 -1.746813543993E-01  
-1.851197715490E-01 3.091018767877E-02 1.757089993006E-01  
-1.860720781261E-01 3.312391573955E-02 -3.218200396791E-01  
-1.865318838476E-01 4.618395419826E-01 3.215899442351E-01  
2.104416792856E-01 -4.328473211938E-01 7.373230187664E-02  
2.116892913534E-01 4.271333624610E-01 -7.463969755028E-02  
2.117013647990E-01 6.717923137732E-02 7.443650184348E-02  
2.117798755081E-01 -7.180292473291E-02 -7.386385968196E-02  
2.121727839790E-01 -4.334057412376E-01 -4.258150201441E-01  
2.124009371446E-01 4.288737532896E-01 4.264310813374E-01  
2.127274003810E-01 -7.178942630739E-02 4.252874375667E-01  
2.132055168419E-01 6.784063511242E-02 -4.253029239843E-01  
-2.153950917565E-01 -4.373272097344E-01 4.268909880535E-01  
-2.171755727709E-01 -6.752459597304E-02 -4.262928208108E-01  
-2.200233388045E-01 4.249585835286E-01 -4.224539455344E-01  
-2.212233772640E-01 -4.324859527455E-01 -7.457417598241E-02  
-2.213213888529E-01 6.957782992550E-02 4.242924340592E-01  
-2.218422085962E-01 6.697944147421E-02 -7.416407103764E-02  
-2.221995568477E-01 4.269766578245E-01 7.573490866281E-02  
-2.222212932811E-01 -7.208130183848E-02 7.532639939823E-02  
2.730552738331E-02 -3.259619196848E-01 3.195399284062E-01  
2.780437240476E-01 4.279599241686E-01 7.420438240029E-02  
2.786083913225E-01 6.755458203708E-02 -7.434287872077E-02  
2.790018305014E-01 -4.338997723525E-01 -7.415913863446E-02  
2.790301930161E-01 -7.180625665911E-02 7.480903858165E-02  
2.790442105177E-01 6.785576623946E-02 4.252631221946E-01  
2.791008878940E-01 -7.177960442293E-02 -4.252539743104E-01  
2.806867460695E-01 4.287632117722E-01 -4.253583991979E-01  
2.807398336391E-01 -4.324864926915E-01 4.241492408526E-01  
2.840657009817E-02 -1.787409211637E-01 -3.192069850657E-01  
-2.844748655079E-01 -7.136928612601E-02 4.264489058104E-01  
-2.849233716796E-01 -4.351989570130E-01 -4.256977178564E-01  
-2.858897215976E-01 4.265628956447E-01 4.259902534659E-01  
-2.872006764309E-01 -4.327900790955E-01 7.469965686776E-02  
-2.873433827766E-01 6.937976743012E-02 -4.245896250723E-01  
2.878054871414E-02 -3.262319828137E-01 -1.802107477582E-01  
-2.878701024198E-01 4.283199133332E-01 -7.403584040226E-02  
-2.879507006309E-01 -7.256592823169E-02 -7.424502797385E-02  
-2.881305353904E-01 6.756101235190E-02 7.515357454673E-02  
2.881598548414E-02 -1.788754690833E-01 1.814279706324E-01  
2.887015501783E-02 1.734201115247E-01 -1.801706098298E-01  
2.894458257841E-02 3.214729040785E-01 -3.189168169781E-01  
2.925212190690E-02 3.216098914283E-01 1.810817507190E-01  
2.966922408086E-02 1.735571744376E-01 3.192555885303E-01  
3.130348600865E-01 -4.691536725397E-01 1.747880048042E-01  
3.145420614279E-01 4.627846667676E-01 -1.755886969303E-01  
3.146248398698E-01 3.218261896300E-02 1.754925083241E-01  
3.149561528601E-01 -3.537441223453E-02 -1.746526962312E-01  
3.151517904084E-01 -4.681275012490E-01 -3.235295763686E-01  
3.153123527872E-01 -3.511796030816E-02 3.241828334717E-01  
3.154367786389E-01 3.099170795444E-02 -3.240488807223E-01  
3.171488244146E-01 4.644060720746E-01 3.257881088591E-01  
3.172222596742E-01 -1.844593283980E-01 4.672098898434E-01  
3.189557929974E-01 -3.224706144239E-01 3.274824950584E-02  
3.196862118473E-01 3.172714344329E-01 4.668486156655E-01  
3.197819996105E-01 -1.825983249709E-01 -3.326841133792E-02  
3.200274740076E-01 1.780537272589E-01 3.341918048763E-02  
3.210748857947E-01 3.178533559605E-01 -3.238742522885E-02  
3.215081299820E-01 1.781292680449E-01 -4.665076312774E-01  
3.236672329864E-01 -3.272654194281E-01 -4.707382924315E-01  
-3.238591093821E-01 -3.536241293584E-02 -3.256476653642E-01  
-3.239274314889E-01 4.645116203156E-01 -3.236232582730E-01  
-3.239354388639E-01 2.982847507069E-02 -1.756791882174E-01  
-3.240017470072E-01 2.966771808821E-02 3.251149519140E-01  
-3.240023278331E-01 4.659107198169E-01 1.766008777254E-01  
-3.240392740429E-01 -4.691676366981E-01 3.271233617584E-01  
-3.243555515098E-01 -4.689867964151E-01 -1.751307985085E-01

-3.250864968418E-01 -3.536132856187E-02 1.760150976854E-01  
-3.280076624278E-01 -3.292175334313E-01 4.647961229019E-01  
-3.285499353356E-01 1.792892942307E-01 4.663622508321E-01  
-3.287881774751E-01 -1.779404794197E-01 -4.626043465419E-01  
-3.288094329237E-01 3.176873166847E-01 -4.659186946854E-01  
-3.289205570825E-01 1.780690603124E-01 -3.382902132279E-02  
-3.289465204830E-01 -1.835030796537E-01 3.426380648150E-02  
-3.292394433246E-01 3.171717892066E-01 3.309269161619E-02  
-3.295562054511E-01 -3.226054315776E-01 -3.241476642585E-02  
-3.728956899129E-02 3.224725037797E-01 3.205017793741E-01  
-3.733950810079E-02 -3.286410009271E-01 -3.197344641432E-01  
-3.740802722001E-02 3.225119155715E-01 -1.792770912556E-01  
-3.765899254740E-02 1.728450807855E-01 1.802732166405E-01  
-3.785397446253E-02 -1.769579674584E-01 -1.798995493185E-01  
-3.785405505757E-02 1.726569115947E-01 -3.194269403739E-01  
-3.797180619511E-02 -3.281006669891E-01 1.796495731558E-01  
-3.866241112367E-02 -1.761703259273E-01 3.201513609711E-01  
4.155402743126E-01 -2.195892585602E-01 -4.260545791733E-01  
4.191544344759E-01 -2.199733718924E-01 7.075007711564E-02  
4.204063450680E-01 -2.826784015955E-01 4.303943370574E-01  
4.206588299004E-01 2.144820074861E-01 -7.011841969750E-02  
4.207595063483E-01 -2.857927350324E-01 -6.887871480021E-02  
4.212022881815E-01 2.156616022226E-01 4.298834666883E-01  
4.216137034496E-01 2.821163068358E-01 -4.304157974212E-01  
4.217516921893E-01 2.799711747041E-01 6.995118711112E-02  
4.232681612553E-01 -4.305625792241E-01 2.809566941719E-01  
4.248909855629E-01 7.394303943699E-02 2.837461531027E-01  
4.249813784081E-01 4.209875338821E-01 2.143270564012E-01  
4.250538246460E-01 -7.705091030994E-02 -2.813654537594E-01  
4.255305103554E-01 7.306975384439E-02 -2.167033333995E-01  
4.257359719663E-01 4.230487327634E-01 -2.834711836521E-01  
4.263970341569E-01 -7.424348603774E-02 2.148066977466E-01  
4.265516101420E-01 -4.300621726643E-01 -2.134633374416E-01  
-4.279001211470E-01 -2.160436012392E-01 4.207902760329E-01  
-4.293315859931E-01 2.136042166311E-01 6.965904792198E-02  
-4.296977635052E-01 2.828300773460E-01 4.307517853584E-01  
-4.300335255076E-01 2.142356547360E-01 -4.308604508901E-01  
-4.300428132668E-01 -2.190218612082E-01 -6.860225398262E-02  
-4.304595285951E-01 2.811238265883E-01 -6.920848994670E-02  
-4.307880002503E-01 -2.863142004242E-01 7.003017540527E-02  
-4.345910051623E-01 -4.262736391880E-01 2.180814713857E-01  
-4.346593846322E-01 -7.723827381452E-02 -2.171787256224E-01  
-4.347882564027E-01 7.197161072215E-02 -2.830556556357E-01  
-4.350641763960E-01 4.235371787677E-01 -2.163123026675E-01  
-4.352451632204E-01 7.147014731898E-02 2.182060555037E-01  
-4.361199276007E-01 -4.274414203153E-01 -2.831491860146E-01  
-4.364328910899E-01 -7.791129125694E-02 2.845199057654E-01  
-4.365519447538E-01 4.254160318006E-01 2.832224832524E-01  
-4.376261989109E-01 -2.902807876056E-01 -4.298969355372E-01  
4.569660667577E-01 -1.811134749174E-01 3.128892836486E-01  
4.575347919952E-01 -3.251947510108E-01 -3.136911324251E-01  
4.616737238555E-01 -3.258910571359E-01 1.818288098973E-01  
4.624720420543E-01 3.218298944436E-01 -1.810162584156E-01  
4.626687145679E-01 -1.774821360870E-01 -1.785426225876E-01  
4.627722702848E-01 3.218280530687E-01 3.183735270972E-01  
4.628326209332E-01 1.738178654539E-01 -3.193205555208E-01  
4.634446766464E-01 1.739281513433E-01 1.813970435683E-01  
-4.692717787111E-01 3.227505954904E-01 1.798725186984E-01  
-4.702589450849E-01 1.730873673751E-01 3.208245356909E-01  
-4.706655588125E-01 3.232349115503E-01 -3.203704420236E-01  
-4.706970829662E-01 1.729543274661E-01 -1.801039648314E-01  
-4.711116642606E-01 -3.283652601855E-01 -1.777536354642E-01  
-4.712714667115E-01 -1.762278581867E-01 1.782457129940E-01  
-4.735685417716E-01 -1.783148374107E-01 -3.191437422682E-01  
-4.814090364116E-01 -3.340182521794E-01 3.266753026732E-01  
6.546966214427E-02 -7.717452472353E-02 -2.175762269443E-01  
6.553707120870E-02 -4.271735616181E-01 2.180617669749E-01  
6.570824006880E-02 -7.710965138210E-02 2.829828891691E-01  
6.579715909612E-02 7.245658390478E-02 2.166291113717E-01  
6.584137468250E-02 7.282069276691E-02 -2.829043649182E-01  
6.590719311913E-02 4.227175347320E-01 2.839852385667E-01  
6.610164407703E-02 -4.279307035720E-01 -2.820794251963E-01

6.643492613309E-02 4.220860231588E-01 -2.166341515629E-01  
6.981416593448E-02 2.808067608795E-01 -6.898741210407E-02  
6.996018557019E-02 -2.183549976266E-01 -6.933472205539E-02  
6.998664701217E-02 -2.856022581583E-01 6.972045561255E-02  
7.004161303928E-02 -2.861558286240E-01 -4.306674718554E-01  
7.030990489340E-02 2.141719669925E-01 7.021205866012E-02  
7.047271821681E-02 2.805240860775E-01 4.309411475410E-01  
7.070074472462E-02 -2.192633829649E-01 4.294357378179E-01  
7.135691350468E-02 2.143368591005E-01 -4.293456085783E-01  
-7.287087443306E-02 4.232039959036E-01 2.165421699008E-01  
-7.296617796195E-02 -4.286704260211E-01 -2.151561518393E-01  
-7.308763965591E-02 -7.587167892975E-02 2.155277160956E-01  
-7.321726827451E-02 7.161492845868E-02 -2.158497346971E-01  
-7.326153049619E-02 4.229470451414E-01 -2.824792440409E-01  
-7.343994676962E-02 7.242100605969E-02 2.833235476143E-01  
-7.412071224121E-02 -7.653441241681E-02 -2.837187449537E-01  
-7.416025792924E-02 -4.285011222546E-01 2.839617389605E-01  
-7.766747036148E-02 2.807735228114E-01 -4.306087699167E-01  
-7.836964264335E-02 2.136288673041E-01 4.303820940175E-01  
-7.890189611974E-02 -2.845481576154E-01 4.306637230646E-01  
-7.891480809139E-02 -2.850508202084E-01 -6.940356621446E-02  
-7.897102784824E-02 2.807029278020E-01 6.998083399824E-02  
-7.903244635272E-02 -2.201752503801E-01 -4.292386736737E-01  
-7.914087171414E-02 -2.190801301535E-01 7.025658148219E-02  
-7.932533099588E-02 2.141621252770E-01 -6.938462836359E-02  
1.200946454026E-01 -2.520742462150E-01 4.999212702712E-01  
1.203583073457E-01 -2.522292013832E-01 8.717546617421E-06  
1.204145111170E-01 2.472833542654E-01 3.136205872911E-04  
1.211433694352E-01 2.479437645397E-01 -4.992538655483E-01  
-1.284960001251E-01 2.472510712642E-01 -4.998672858486E-01  
-1.294154492088E-01 -2.520996096592E-01 3.568897166144E-04  
-1.296115523749E-01 2.475347935052E-01 3.476982359138E-04  
-1.299493680505E-01 -2.527148819572E-01 -4.991351676891E-01  
2.436228222634E-01 4.974427994564E-01 1.237815000912E-01  
2.451786352232E-01 -2.289522934247E-03 -1.243935226116E-01  
2.454790443016E-01 4.967162574365E-01 -1.248531288933E-01  
2.454791675997E-01 -2.085238359883E-03 1.250683231713E-01  
2.455286801691E-01 4.967158278607E-01 3.744672574917E-01  
2.458079557846E-01 -1.876795235192E-03 3.749037274651E-01  
2.459853914008E-01 -2.001835185817E-03 -3.747788051415E-01  
2.463034843622E-01 4.976613604153E-01 -3.744385453637E-01  
-2.528111111981E-01 4.966573800541E-01 3.755384140984E-01  
-2.531478367287E-01 4.962740035916E-01 -3.739765335491E-01  
-2.533358195551E-01 -2.039838281255E-03 3.755056443777E-01  
-2.536712190587E-01 -9.251930722782E-04 -3.747821019387E-01  
-2.540864196855E-01 4.977872631757E-01 1.254273687883E-01  
-2.544640337011E-01 -2.973137957040E-03 -1.247337662953E-01  
-2.545685696994E-01 4.977538796917E-01 -1.248424097168E-01  
-2.552013518752E-01 -2.233559726453E-03 1.257466983005E-01  
3.696004568638E-01 -2.515023079464E-01 -4.983881164620E-01  
3.696258332445E-01 -2.525717519259E-01 8.251357680431E-05  
3.709462568090E-01 2.473444039097E-01 2.041445722087E-04  
3.712259085884E-01 2.482538325234E-01 -4.998735318088E-01  
-3.792602529016E-01 2.483590098917E-01 -4.998591513400E-01  
-3.794532500992E-01 2.473673161047E-01 -1.754013897726E-04  
-3.797125512306E-01 -2.527327881886E-01 7.763737200912E-04  
-3.929699843044E-03 1.227749046744E-01 2.499622390502E-01  
-3.941793641847E-03 3.721826327505E-01 -2.493302647926E-01  
-3.978653207340E-03 3.723807467206E-01 2.504985320508E-01  
-4.126379140099E-03 -3.777798824380E-01 -2.492272742802E-01  
-4.328040429653E-03 1.225533598600E-01 -2.495946284081E-01  
-4.612853610917E-03 -1.269720537183E-01 2.499972533484E-01  
-4.822078278777E-03 -1.272719810411E-01 -2.502410200148E-01  
4.939564563487E-01 -3.782496064231E-01 2.497331005599E-01  
4.943014767333E-01 -1.268314558279E-01 2.483946885958E-01  
4.943646558998E-01 -3.776321481771E-01 -2.478465971032E-01  
4.951399819204E-01 -1.277863420275E-01 -2.492738177928E-01  
4.958042350221E-01 3.729502123460E-01 -2.501477336650E-01  
4.958584623305E-01 1.227223684296E-01 -2.498714529326E-01  
4.958893915995E-01 1.229772557999E-01 2.511169569888E-01  
4.959036627943E-01 3.726499150672E-01 2.490195729239E-01  
-5.262776926088E-03 -3.773911211458E-01 2.503379146896E-01

4.99999998918E-01 4.99999998918E-01 4.99999998918E-01

Na3Ca

1.00000000000000

17.65576151 0.00000000 0.00000000

0.00000000 17.65576151 0.00000000

0.00000000 0.00000000 17.65576151

Al Ca Cl Na O Si Xx

48 1 15 62 192 48 1

Direct

1.229853124189E-01 -4.973095763897E-01 2.489490670113E-01  
1.231625003558E-01 2.106486639046E-03 -2.517966278584E-01  
1.231681783658E-01 2.515419538908E-03 2.490263497429E-01  
1.233017101749E-01 -4.982076930198E-01 -2.507920604268E-01  
-1.259714794430E-01 -4.983114980609E-01 -2.505357144236E-01  
-1.267022791886E-01 2.495774498173E-03 2.482142922035E-01  
-1.270676647972E-01 2.135790615135E-03 -2.512089536956E-01  
-1.274328632675E-01 -4.972492517590E-01 2.496137400605E-01  
-1.752887770495E-03 2.516943437339E-01 -1.257065404163E-01  
-1.829625776076E-03 2.526803226463E-01 1.242701652195E-01  
-2.106929186483E-03 2.523967772057E-01 3.742156786346E-01  
-2.164440948388E-03 -2.475032800609E-01 -1.264486007845E-01  
-2.186425063991E-03 2.522023391410E-01 -3.760592651133E-01  
-2.224524002106E-03 -2.479679389774E-01 1.235837959124E-01  
-2.348900634019E-03 -2.470637937710E-01 3.735442779018E-01  
-2.403945515298E-03 -2.487765298698E-01 -3.764336522636E-01  
2.471043309345E-01 -3.736206374206E-01 4.993261887603E-01  
2.475635152219E-01 -1.222098135605E-01 -1.051856667778E-03  
2.475955894947E-01 -3.727296501014E-01 -1.860149926440E-03  
2.476655400317E-01 3.768016195084E-01 4.990588589612E-01  
2.480378535790E-01 1.275675463445E-01 -1.196406758133E-03  
2.483881980290E-01 -1.235881473323E-01 4.990184153863E-01  
2.484518928420E-01 3.778201643953E-01 -1.155530113263E-03  
2.485285542680E-01 1.270165534207E-01 4.990093504730E-01  
-2.512718931196E-01 -1.216049179836E-01 4.989080219627E-01  
-2.515074151497E-01 3.768734257146E-01 -1.168124687613E-03  
-2.518637886973E-01 1.279676959571E-01 4.986577901231E-01  
-2.521844410525E-01 1.270615046814E-01 -1.293128996276E-03  
-2.522611157742E-01 -1.231682782445E-01 -1.296976326507E-03  
-2.523611959153E-01 3.776991854190E-01 4.992047642342E-01  
-2.525759648889E-01 -3.727580370941E-01 -1.830780402004E-03  
-2.538312870393E-01 -3.719148942243E-01 -4.996595632130E-01  
3.725521587178E-01 -4.987907296467E-01 2.473645429985E-01  
3.729310022689E-01 2.482689260874E-03 -2.507025977015E-01  
3.731787854167E-01 -4.975345132484E-01 -2.516265663381E-01  
3.733518655211E-01 2.833271652680E-03 2.484223674816E-01  
-3.763575690819E-01 -4.965345520587E-01 -2.530570024072E-01  
-3.768302920804E-01 2.066600155716E-03 -2.515533237335E-01  
-3.771372351388E-01 2.199537561966E-03 2.489748058942E-01  
-3.774298785859E-01 -4.980342768742E-01 2.487887119006E-01  
4.974467876284E-01 -2.474057783324E-01 -1.249477985322E-01  
4.977858668185E-01 -2.476911464749E-01 1.247011476285E-01  
4.980095121329E-01 2.523516464946E-01 -3.769937989209E-01  
4.981227742770E-01 2.521900387964E-01 3.732525053374E-01  
4.985575685758E-01 2.530352350397E-01 -1.269208559178E-01  
4.985965998707E-01 2.523623163515E-01 1.233868287388E-01  
4.989418595767E-01 -2.487578931717E-01 -3.753242003459E-01  
4.999360865039E-01 -2.460527174910E-01 3.738784928996E-01  
4.149110070953E-01 -4.128041361013E-01 4.162046504041E-01  
-1.559027937160E-03 2.353365345098E-03 -8.257894684905E-04  
-1.822962126199E-03 -4.974416897654E-01 4.978110117578E-01  
-1.841429927255E-03 -4.980443096736E-01 -1.454995250756E-04  
2.476169185482E-01 -2.473039730039E-01 -2.518309181687E-01  
2.477298795349E-01 2.526299669168E-01 2.487055668500E-01  
2.481892368808E-01 2.513412355082E-01 -2.506687205503E-01  
2.482297434282E-01 -2.478687948152E-01 2.498584455694E-01  
-2.510593607097E-01 2.525629524823E-01 2.482477478208E-01  
-2.510601609036E-01 -2.46662523191E-01 -2.498030076510E-01  
-2.516353361356E-01 2.513633154024E-01 -2.505211495977E-01  
-2.521791841999E-01 -2.477977776311E-01 2.481117653686E-01



4.969453255329E-01 2.028524033779E-03 4.988100241203E-01  
4.972649013946E-01 2.557879739775E-03 -1.109755097288E-03  
4.980902085302E-01 -4.977569072198E-01 -1.091582236271E-03  
-8.956609436215E-04 2.186423078180E-03 4.980873561574E-01  
1.572582556558E-01 -3.352001428482E-01 3.370663650662E-01  
1.579717775334E-01 -1.587993032487E-01 -3.394526989420E-01  
1.585784904923E-01 3.411894448535E-01 1.596129541046E-01  
1.586793433095E-01 -1.583163709090E-01 1.597195320455E-01  
1.587252105412E-01 -3.365236487627E-01 -1.631755860048E-01  
1.588078855783E-01 1.633708981597E-01 3.382614356174E-01  
1.590093278924E-01 1.629777898156E-01 -1.619144997913E-01  
1.592564528758E-01 3.403896444909E-01 -3.389998113910E-01  
-1.626625741800E-01 1.633093604410E-01 1.595557415921E-01  
-1.629832394981E-01 3.413306973121E-01 -1.624251341596E-01  
-1.630651749109E-01 -1.587487577203E-01 -1.622263106131E-01  
-1.632517245855E-01 1.634652050161E-01 -3.397911877551E-01  
-1.634176463995E-01 3.420430606075E-01 3.383635639509E-01  
-1.635804264801E-01 -3.367998651686E-01 1.589244992264E-01  
-1.636716413810E-01 -1.584831480354E-01 3.381567317172E-01  
-1.66020008143E-01 -3.385666270129E-01 -3.413339622722E-01  
3.357156033509E-01 -3.347794851524E-01 1.587632662680E-01  
3.360436639164E-01 -1.574658974899E-01 3.374461846925E-01  
3.373413678189E-01 1.627683872558E-01 -3.396269070025E-01  
3.374190119512E-01 -1.587450601199E-01 -1.622109047209E-01  
3.374616891527E-01 1.640725343910E-01 1.593281897431E-01  
3.375405180317E-01 3.395717129432E-01 3.381671625255E-01  
3.378086748956E-01 3.411346028613E-01 -1.627718188836E-01  
-3.385517009478E-01 -3.365239229464E-01 3.397665051227E-01  
3.389975779892E-01 -3.366656662714E-01 -3.378768473576E-01  
-3.397178460484E-01 3.410934360966E-01 1.590980428298E-01  
-3.397373561539E-01 1.637939497726E-01 3.375174267377E-01  
-3.399333236901E-01 3.423873114250E-01 -3.392292447560E-01  
-3.401461046985E-01 -1.587388560234E-01 1.594760847993E-01  
-3.408771579293E-01 1.628385527296E-01 -1.627132365502E-01  
-3.415889023099E-01 -1.603752624082E-01 -3.406609440985E-01  
-3.426379875165E-01 -3.385719398069E-01 -1.649552898885E-01  
4.084906566643E-01 -8.662879059586E-02 8.710777435246E-02  
4.088400784190E-01 9.201684097457E-02 -9.037717299328E-02  
4.092707638894E-01 9.123305128540E-02 4.098304708820E-01  
4.097567586316E-01 4.126500905218E-01 8.570561191040E-02  
4.106045735998E-01 -4.078101569621E-01 -9.134716352827E-02  
4.106062864956E-01 -8.729484223520E-02 -4.100068405804E-01  
-4.109632828039E-01 -8.464353130400E-02 4.112829702210E-01  
4.113394503323E-01 4.145334842858E-01 -4.135113301607E-01  
-4.120781812296E-01 4.146873129419E-01 -9.267284434860E-02  
-4.121153031677E-01 -4.095961109639E-01 8.663667439820E-02  
-4.130788762096E-01 9.082947507786E-02 -4.122347152226E-01  
-4.131532868845E-01 9.113380387807E-02 8.726000028546E-02  
-4.135868697186E-01 -8.662278441284E-02 -9.035438317587E-02  
-4.140808965934E-01 4.149560902609E-01 4.120560894416E-01  
8.493738920269E-02 -4.096370605394E-01 -4.112347468200E-01  
8.559556623034E-02 4.124537250978E-01 4.105183485558E-01  
8.631742252714E-02 -8.659702206161E-02 -9.094665336344E-02  
8.632080004999E-02 -4.083690641384E-01 8.772829607775E-02  
8.694251443541E-02 9.187320050480E-02 8.790303158796E-02  
8.707194698864E-02 4.132782098868E-01 -8.951063047323E-02  
8.723132949911E-02 9.098312713189E-02 -4.123415705673E-01  
8.753546577282E-02 -8.668704100701E-02 4.091438873746E-01  
-9.040336142831E-02 -8.701159649718E-02 -4.129447462425E-01  
-9.064159827725E-02 9.142867454101E-02 4.098196927062E-01  
-9.107527755602E-02 9.059481929648E-02 -9.024637827564E-02  
-9.126045724741E-02 4.130724125465E-01 8.845101409331E-02  
-9.142452456991E-02 -4.093865163975E-01 -8.977306165664E-02  
-9.148228682302E-02 -8.685215028740E-02 8.700463828335E-02  
-9.158658082826E-02 4.147904636348E-01 -4.110941599148E-01  
-9.357382709507E-02 -4.079382651227E-01 4.110837129525E-01  
1.727275335365E-01 3.223588009161E-01 -4.674510315295E-01  
1.727959943681E-01 -3.177176278772E-01 -3.503904895695E-02  
1.733794802943E-01 1.828419042025E-01 -3.407672081562E-02  
1.734848698430E-01 -1.783446101723E-01 -4.675457924543E-01  
1.735893906247E-01 -1.783981153591E-01 3.204021722067E-02  
1.739119491850E-01 3.224833535924E-01 3.204009614750E-02

1.741527565790E-01 1.828110734290E-01 4.661537403170E-01  
1.749036450825E-01 -3.167219938274E-01 4.652757239383E-01  
-1.765890337135E-01 3.219089458720E-01 -3.429394843413E-02  
-1.766515011389E-01 -1.768691410124E-01 4.657532874681E-01  
-1.769519589024E-01 -1.774819629934E-01 -3.454564941551E-02  
-1.770042317950E-01 -3.171829468078E-01 -4.686299017714E-01  
-1.771616592705E-01 1.827464539510E-01 -4.674650878282E-01  
-1.777065228715E-01 1.824902752793E-01 3.210052572266E-02  
1.779966299162E-01 3.504545308752E-02 3.243364659472E-01  
1.781290326170E-01 3.535830751230E-02 -1.769610472260E-01  
-1.782368908572E-01 -3.169882750502E-01 3.140661991607E-02  
-1.783073818638E-01 3.215751885436E-01 4.654601186757E-01  
1.783141046594E-01 4.683827715423E-01 -3.257821383696E-01  
1.786044163353E-01 -3.142609561010E-02 -3.262908653195E-01  
1.787121554999E-01 -4.642343671388E-01 -1.766199144979E-01  
1.788078509774E-01 -3.050147349441E-02 1.746934304891E-01  
1.788466257144E-01 4.692767526427E-01 1.748531369352E-01  
-1.792240439533E-01 -4.660197149560E-01 -3.261736909962E-01  
1.795210778111E-01 -4.636196914970E-01 3.231165486123E-01  
-1.809939625094E-01 4.688587899992E-01 -1.755505804541E-01  
-1.818883770709E-01 -3.115945790318E-02 -1.762236469640E-01  
-1.819040785530E-01 -3.025951510748E-02 3.229512064962E-01  
-1.822917636802E-01 3.552266806021E-02 1.737504038444E-01  
-1.826722619408E-01 -4.646460836656E-01 1.746838093049E-01  
-1.829516604798E-01 3.616496805339E-02 -3.249690352396E-01  
-1.830031497920E-01 4.699639550303E-01 3.240910373714E-01  
2.134415699124E-01 -4.292465101387E-01 -4.273696184900E-01  
2.141201219337E-01 -6.710851969681E-02 -7.562155477447E-02  
2.143971845098E-01 -4.279209176979E-01 7.310512654760E-02  
2.144320795321E-01 4.328151764882E-01 4.243513513691E-01  
2.148327749068E-01 7.268132501265E-02 7.372714270069E-02  
2.150228043162E-01 4.332040141523E-01 -7.543973357033E-02  
2.151802499416E-01 7.115861217415E-02 -4.269905933453E-01  
2.163109453255E-01 -6.875857158133E-02 4.236663932676E-01  
-2.174501158595E-01 -6.605767362804E-02 -4.269122748712E-01  
-2.181403046401E-01 4.321992344422E-01 -4.267857834445E-01  
-2.185756343757E-01 7.348689411779E-02 4.233323746389E-01  
-2.187178319553E-01 -4.284745546207E-01 -7.550691541862E-02  
-2.187918598728E-01 7.146858405166E-02 -7.553958782801E-02  
-2.190538737170E-01 4.320140394873E-01 7.409349047763E-02  
-2.193727633008E-01 -6.777492670796E-02 7.347644771603E-02  
-2.209434262129E-01 -4.266719384062E-01 4.241477856435E-01  
2.807611638722E-01 7.221951691357E-02 -7.587528997022E-02  
2.808425476063E-01 -6.694951335959E-02 7.353158032539E-02  
2.814812206431E-01 7.170038146049E-02 4.243025421266E-01  
-2.816163535898E-01 -4.273030660048E-01 -4.248745588387E-01  
2.816176870688E-01 4.326119616031E-01 -4.270829419918E-01  
2.816882479871E-01 4.330206082987E-01 7.379628948292E-02  
2.820306366976E-01 -4.279866499999E-01 -7.591033168416E-02  
2.822352908680E-01 -6.811670477972E-02 -4.269218270118E-01  
2.833410974166E-01 -4.285177964437E-01 4.240799051040E-01  
-2.840531110260E-01 -6.624561801830E-02 4.241074159151E-01  
-2.845958287501E-01 4.320119335679E-01 -7.557543276405E-02  
-2.848644025561E-01 -4.279011164827E-01 7.349425252099E-02  
-2.851889655813E-01 7.241071854239E-02 -4.269518158544E-01  
-2.856020446215E-01 7.181151436956E-02 7.336218293400E-02  
-2.856026438663E-01 -6.770188810034E-02 -7.575600758513E-02  
-2.858950972254E-01 4.323606112356E-01 4.239647661610E-01  
3.067846137618E-02 -1.743514209867E-01 -3.206999285276E-01  
3.095456858290E-02 3.274247673003E-01 1.797507247649E-01  
3.098875128104E-02 -3.211307483515E-01 3.176199239539E-01  
3.111622269972E-02 -1.737409768409E-01 1.793288685908E-01  
3.111964523258E-02 1.779793944459E-01 3.187146275823E-01  
3.140170968850E-02 -3.212273521343E-01 -1.826120369488E-01  
3.145415669321E-02 1.773002764495E-01 -1.813626950062E-01  
3.170804383795E-01 -4.641127940319E-01 -3.260892765881E-01  
-3.171303888699E-01 4.669916950998E-01 -3.226454716681E-01  
3.172325443890E-01 -4.632958794427E-01 1.745082946536E-01  
3.174575051065E-01 4.686080648992E-01 -1.773473203675E-01  
3.175425807312E-01 -3.080365502054E-02 -1.762066871829E-01  
3.179149688026E-01 3.500888929118E-02 -3.258823429416E-01  
3.180252776162E-01 -3.048583077178E-02 3.229482344350E-01

3.181370225857E-01 3.616034634319E-02 1.739165987871E-01  
3.195081508194E-01 4.698295852056E-01 3.246532420525E-01  
3.197795387595E-02 3.258524223344E-01 -3.201247775730E-01  
3.209547651577E-01 -3.165098170660E-01 3.241605649357E-02  
3.209694047033E-01 3.205737812376E-01 4.649250754831E-01  
-3.212985917792E-01 3.523459001349E-02 -1.770136947414E-01  
3.213656567126E-01 -1.817000380479E-01 4.655223125529E-01  
-3.215626675486E-01 -4.656124954078E-01 -1.761929005460E-01  
-3.216951136125E-01 3.580196482202E-02 3.232219676237E-01  
-3.217859380191E-01 -3.113213422689E-02 1.744988197231E-01  
-3.219595890957E-01 -3.096433111158E-02 -3.265934705238E-01  
-3.225475958567E-01 4.694270506020E-01 1.738251338645E-01  
-3.227363273606E-01 -4.644143094635E-01 3.232485498654E-01  
3.229697545837E-01 -1.767122000519E-01 -3.356374654919E-02  
3.229781686484E-01 1.828026037484E-01 3.133761516402E-02  
3.232857669596E-01 3.228360959902E-01 -3.424770463085E-02  
-3.234849092642E-01 -3.124327036497E-01 4.638538228124E-01  
3.234990590343E-01 1.818977915675E-01 -4.678402958891E-01  
-3.257328711990E-01 3.210690795696E-01 3.205496318385E-02  
-3.259576247746E-01 -1.794008917448E-01 3.252568326211E-02  
-3.262343303277E-01 1.835252326182E-01 4.650688962395E-01  
-3.268016860063E-01 1.820993823395E-01 -3.498152442063E-02  
-3.270443693476E-01 -1.748471835934E-01 -4.683894918801E-01  
3.273267345271E-01 -3.237386710510E-01 -4.711857090266E-01  
-3.274741081806E-01 3.224855656006E-01 -4.678223616983E-01  
-3.282270565056E-01 -3.184321284148E-01 -3.453176442454E-02  
-3.478670933889E-02 3.263538851643E-01 -1.807991514786E-01  
-3.485808315370E-02 1.777639590751E-01 1.791355916733E-01  
-3.491999267936E-02 3.276589955825E-01 3.195297562490E-01  
-3.530229563670E-02 -1.723387058837E-01 -1.810496357812E-01  
-3.534087654910E-02 1.774807879387E-01 -3.208272854497E-01  
-3.538148832480E-02 -1.720814152234E-01 3.187114356854E-01  
-3.549849527566E-02 -3.239811358949E-01 -3.218496038551E-01  
-3.551327610043E-02 -3.230307299762E-01 1.783192224941E-01  
4.217329651279E-01 -2.156690830916E-01 -4.295691440517E-01  
4.221353389571E-01 -2.152565892179E-01 7.056213203885E-02  
4.225896991103E-01 -2.803015120689E-01 -6.964363832147E-02  
4.230677905212E-01 2.192251440477E-01 4.281733363761E-01  
4.233605631074E-01 2.860413302678E-01 -4.323846559493E-01  
4.235761169691E-01 2.852860427280E-01 6.855162988201E-02  
4.237297162108E-01 2.199696566372E-01 -7.157346650878E-02  
4.255030217235E-01 -2.819756336063E-01 4.298926323589E-01  
-4.255283155454E-01 -2.121068293290E-01 4.268487419940E-01  
-4.269991763727E-01 2.861241857365E-01 -7.124410997800E-02  
4.272526911854E-01 -4.239060222519E-01 2.843997722948E-01  
4.272658866860E-01 -4.228165034286E-01 -2.181690092921E-01  
-4.273533439563E-01 2.188352956097E-01 6.781822266819E-02  
-4.276661265882E-01 2.862312923672E-01 4.285416168789E-01  
4.277074481795E-01 4.274418436095E-01 -2.853997450125E-01  
4.278107774627E-01 7.772561943183E-02 -2.182059911295E-01  
-4.278152077149E-01 -2.815983170931E-01 6.971815537017E-02  
4.280978901665E-01 -7.218632694401E-02 -2.832409660192E-01  
4.281818475415E-01 -7.227734462220E-02 2.153416602378E-01  
-4.282476362390E-01 2.182861436440E-01 -4.328842301891E-01  
4.285076917183E-01 4.277956224388E-01 2.142408131709E-01  
4.285861343394E-01 7.724443695720E-02 2.819581306534E-01  
-4.288309413558E-01 -2.136318654233E-01 -6.867739040376E-02  
-4.289861308613E-01 -2.767265305584E-01 -4.340725357780E-01  
-4.316338309786E-01 -4.214749718792E-01 -2.808403467405E-01  
-4.318907490481E-01 4.280931186682E-01 -2.196998027996E-01  
-4.321984714208E-01 -7.206984671809E-02 -2.176972898859E-01  
-4.323837327463E-01 7.658930678465E-02 2.151501655235E-01  
-4.324563648699E-01 7.675965331793E-02 -2.844252797272E-01  
-4.330242170151E-01 -7.200405664466E-02 2.828782293532E-01  
-4.332172995670E-01 4.278320913524E-01 2.824217157335E-01  
-4.339636507606E-01 -4.237327801549E-01 2.155259710737E-01  
4.631849778162E-01 -3.187617592260E-01 -3.164257679658E-01  
4.637964434731E-01 -3.209132251886E-01 1.824542683937E-01  
4.638335256630E-01 -1.745770101164E-01 3.170397509988E-01  
4.640833296592E-01 3.253886379738E-01 3.163062317067E-01  
4.649644737759E-01 1.779560803363E-01 -3.212960110012E-01  
4.651402585722E-01 -1.724867180899E-01 -1.803530640056E-01

4.653059861871E-01 1.783390108702E-01 1.794058370373E-01  
4.654385079081E-01 3.272187030051E-01 -1.827239444296E-01  
-4.679123660085E-01 1.774101319611E-01 3.186129189077E-01  
-4.679616959587E-01 3.275671200236E-01 1.779955795862E-01  
-4.681316462679E-01 -1.730403557450E-01 1.794174686820E-01  
-4.685948334230E-01 1.779226709129E-01 -1.817825198796E-01  
-4.687761553608E-01 3.273110490331E-01 -3.224445174495E-01  
-4.693536910539E-01 -1.721990036060E-01 -3.210437660335E-01  
-4.703892542204E-01 -3.230450327181E-01 -1.782329614661E-01  
-4.713293789643E-01 -3.266358331931E-01 3.235061412316E-01  
6.792322631317E-02 -4.226489066111E-01 2.161247478832E-01  
6.794208832498E-02 7.686296425184E-02 -2.847752429836E-01  
6.801832332580E-02 -7.241817980080E-02 2.814653914542E-01  
6.805086352809E-02 -7.277878683492E-02 -2.190372618952E-01  
6.811850089449E-02 4.281219348188E-01 2.825785374313E-01  
6.817619421702E-02 -4.234808900715E-01 -2.839184215082E-01  
6.836476966854E-02 7.744156249759E-02 2.159505149162E-01  
6.898984484358E-02 4.265799159865E-01 -2.174015075429E-01  
-7.034026626701E-02 4.271603874248E-01 -2.835932387526E-01  
-7.048454994184E-02 -4.238874131522E-01 -2.166957833106E-01  
-7.124526193341E-02 7.636781212283E-02 -2.178872867994E-01  
-7.131938298718E-02 -7.195665445690E-02 2.147504020847E-01  
-7.136557133152E-02 7.689674917925E-02 2.817919662077E-01  
-7.162493541686E-02 -7.225339925084E-02 -2.849827680699E-01  
-7.172026893676E-02 4.282909924413E-01 2.165536096807E-01  
-7.179121843682E-02 -4.227517544094E-01 2.826014528767E-01  
7.235242300438E-02 2.186625511809E-01 -4.315136130991E-01  
7.237543137855E-02 -2.142676210006E-01 -7.090930584271E-02  
7.262245952148E-02 -2.809218364863E-01 6.844472252582E-02  
7.262685667343E-02 2.855108264132E-01 -7.039100706427E-02  
7.274555056337E-02 -2.817099394049E-01 -4.319061401220E-01  
7.310514808471E-02 2.850643315823E-01 4.290419382883E-01  
7.327633894243E-02 -2.149379981316E-01 4.284970174734E-01  
7.337330715818E-02 2.199646459423E-01 6.949824320464E-02  
-7.574955692539E-02 -2.144112125565E-01 -4.323143541000E-01  
-7.599894812222E-02 2.181989402689E-01 -7.010900339078E-02  
-7.644127347337E-02 2.862014564453E-01 -4.314703620484E-01  
-7.648079256671E-02 -2.811348449909E-01 -7.096278884290E-02  
-7.657577761011E-02 2.192978381531E-01 4.295185340740E-01  
-7.662446174485E-02 2.852137496502E-01 6.901454245908E-02  
-7.678887951465E-02 -2.803719822901E-01 4.284163427886E-01  
-7.683291476194E-02 -2.147773128536E-01 6.844879406746E-02  
-1.123460068830E-03 3.764679595224E-01 -2.504752241435E-01  
1.228430702478E-01 -2.477793478681E-01 -1.461032677234E-03  
1.229795498313E-01 -2.477662419988E-01 4.987808393746E-01  
1.230109569612E-01 2.520852076129E-01 4.991886946010E-01  
1.232929674670E-01 2.526974026054E-01 -7.999347791394E-04  
-1.267708372675E-01 2.519248244949E-01 -9.253996793773E-04  
-1.271276013980E-01 -2.474722060175E-01 4.985092507994E-01  
-1.271495444584E-01 -2.476953508599E-01 -1.541873541645E-03  
-1.271844724848E-01 2.526934401943E-01 4.991162182257E-01  
-1.731234378606E-03 1.274985834198E-01 2.489141765365E-01  
-1.846211709450E-03 1.270671676397E-01 -2.512302022007E-01  
-1.973469568377E-03 -3.730600343712E-01 -2.512511051721E-01  
-2.006069103084E-03 3.778510588066E-01 2.495641196682E-01  
-2.038168038142E-03 -1.225364056944E-01 2.484840289292E-01  
-2.236149304868E-03 -1.229536265719E-01 -2.515466693389E-01  
-2.415460973803E-03 -3.724517899139E-01 2.487484205927E-01  
2.476343919389E-01 2.374822915300E-03 -1.261593546479E-01  
2.477887373303E-01 -4.982216411091E-01 -3.761623438257E-01  
2.478113842872E-01 -4.972739335924E-01 1.235877071790E-01  
2.478465955823E-01 -4.984901035355E-01 3.73555432942E-01  
2.481162211292E-01 2.910108951798E-03 1.239312033273E-01  
2.483818544667E-01 2.058729252841E-03 3.738742823771E-01  
2.485136420570E-01 -4.975833877546E-01 -1.264178214235E-01  
2.485493041323E-01 1.586406220381E-03 -3.764845769947E-01  
-2.508908909257E-01 -4.975343705711E-01 -3.758642695126E-01  
-2.514117512304E-01 3.244466001247E-03 3.734045484819E-01  
-2.517006940779E-01 -4.981945236955E-01 -1.263025982372E-01  
-2.519404545838E-01 2.750527747554E-03 -3.762861610418E-01  
-2.519757861941E-01 1.882683675486E-03 -1.261942413706E-01  
-2.521122185760E-01 -4.977819331483E-01 1.238647212205E-01

-2.522645999510E-01 2.159847271476E-03 1.237533891577E-01  
-2.530261814016E-01 -4.970276237220E-01 3.745136707275E-01  
3.721954277346E-01 -2.471801760504E-01 -2.936487241957E-04  
3.729735648422E-01 2.520155694355E-01 4.983317797662E-01  
3.734169806171E-01 2.526240554916E-01 -1.616628371649E-03  
3.737395210982E-01 -2.487805248458E-01 -4.999299220876E-01  
-3.764964130888E-01 -2.457232424968E-01 4.985307102918E-01  
-3.767325630674E-01 2.521756371295E-01 -1.782827649034E-03  
-3.772998064212E-01 2.527067394748E-01 4.984269209377E-01  
-3.775796002055E-01 -2.483508528317E-01 -5.483037628029E-04  
4.976801449644E-01 -3.731700670390E-01 2.498283353116E-01  
4.979139070815E-01 -1.224699270631E-01 2.486286936164E-01  
4.980238078746E-01 1.275495535239E-01 -2.514297069338E-01  
4.980527233369E-01 3.769511684115E-01 2.479564579531E-01  
4.981033003891E-01 -1.227231584504E-01 -2.506575340519E-01  
4.982875487639E-01 -3.724388161407E-01 -2.501719072797E-01  
4.984809707862E-01 3.779829241348E-01 -2.525100809891E-01  
4.984908639885E-01 1.274374739992E-01 2.487607344684E-01  
-5.000000000000E-01 -5.000000000000E-01 -5.000000000000E-01

Ca2

1.00000000000000  
17.65576151 0.00000000 0.00000000  
0.00000000 17.65576151 0.00000000  
0.00000000 0.00000000 17.65576151

Al Ca Cl Na O Si Xx

48 2 15 60 192 48 1

Direct

1.244575535548E-01 4.997517721463E-01 -2.488551434511E-01  
-1.244575535548E-01 -4.997517721463E-01 -2.488551434511E-01  
1.248839729777E-01 -1.201835272443E-04 2.497797060590E-01  
-1.248839729777E-01 1.201835272443E-04 2.497797060590E-01  
1.252167824908E-01 3.868892473203E-05 -2.507224967075E-01  
-1.252167824908E-01 -3.868892473203E-05 -2.507224967075E-01  
1.256584627103E-01 -4.999505192570E-01 2.507645944841E-01  
-1.256584627103E-01 4.999505192570E-01 2.507645944841E-01  
1.480959848762E-04 2.495001218330E-01 3.753310820779E-01  
-1.480959848762E-04 -2.495001218330E-01 3.753310820779E-01  
1.545184433445E-04 -2.508583981100E-01 -3.751692208790E-01  
-1.545184433445E-04 2.508583981100E-01 -3.751692208790E-01  
2.492733775885E-01 -3.743963853028E-01 -2.934028286563E-04  
-2.492733775885E-01 3.743963853028E-01 -2.934028286563E-04  
2.494458840397E-01 -1.241053772106E-01 1.057462362269E-04  
-2.494458840397E-01 1.241053772106E-01 1.057462362269E-04  
2.494506546788E-01 -3.765180706897E-01 -4.986460398592E-01  
-2.494506546788E-01 3.765180706897E-01 -4.986460398592E-01  
2.496452137277E-01 1.234203052746E-01 -4.998191767153E-01  
-2.496452137277E-01 -1.234203052746E-01 -4.998191767153E-01  
2.500901366922E-01 1.257583439948E-01 -1.600925406705E-04  
-2.500901366922E-01 -1.257583439948E-01 -1.600925406705E-04  
2.507879130682E-01 -1.270393869423E-01 -4.998126144380E-01  
-2.507879130682E-01 1.270393869423E-01 -4.998126144380E-01  
2.510650749101E-01 3.735501821631E-01 -4.986831537861E-01  
-2.510650749101E-01 -3.735501821631E-01 -4.986831537861E-01  
2.513667279991E-01 3.756240125926E-01 -7.163755335933E-04  
-2.513667279991E-01 -3.756240125926E-01 -7.163755335933E-04  
3.129929192269E-04 2.493006348659E-01 -1.249217175628E-01  
-3.129929192269E-04 -2.493006348659E-01 -1.249217175628E-01  
3.745879247090E-01 4.985100054985E-01 -2.524707666560E-01  
-3.745879247090E-01 -4.985100054985E-01 -2.524707666560E-01  
3.746737293356E-01 6.242082157221E-04 -2.498261591127E-01  
-3.746737293356E-01 -6.242082157221E-04 -2.498261591127E-01  
3.753790419359E-01 4.998936910711E-01 2.491227523871E-01  
-3.753790419359E-01 -4.998936910711E-01 2.491227523871E-01  
3.755573178651E-01 5.371809395290E-04 2.497243202985E-01  
-3.755573178651E-01 -5.371809395290E-04 2.497243202985E-01  
4.978462588786E-01 2.483785188505E-01 3.744159171160E-01  
-4.978462588786E-01 -2.483785188505E-01 3.744159171160E-01  
4.984454809253E-01 -2.501548625886E-01 -1.240769267658E-01  
-4.984454809253E-01 2.501548625886E-01 -1.240769267658E-01

4.990481755799E-01 2.511683672862E-01 -3.746494297529E-01  
-4.990481755799E-01 -2.511683672862E-01 -3.746494297529E-01  
4.995011042122E-01 -2.498842697222E-01 1.253120898092E-01  
-4.995011042122E-01 2.498842697222E-01 1.253120898092E-01  
5.921035315486E-04 2.507852573134E-01 1.253047974508E-01  
-5.921035315486E-04 -2.507852573134E-01 1.253047974508E-01  
4.171046704573E-01 -4.174005399000E-01 4.194097254649E-01  
-4.171046704573E-01 4.174005399000E-01 4.194097254649E-01  
0.000000000000E+00 0.000000000000E+00 1.124511331727E-03  
0.000000000000E+00 0.000000000000E+00 4.982064764494E-01  
0.000000000000E+00 -5.000000000000E-01 2.138887221361E-03  
0.000000000000E+00 -5.000000000000E-01 4.980295740772E-01  
2.490329825910E-01 -2.503075623415E-01 2.505072368145E-01  
-2.490329825910E-01 2.503075623415E-01 2.505072368145E-01  
2.494809402665E-01 2.501218868329E-01 2.492689824293E-01  
-2.494809402665E-01 -2.501218868329E-01 2.492689824293E-01  
2.496977659887E-01 -2.491201990117E-01 -2.501025236641E-01  
-2.496977659887E-01 2.491201990117E-01 -2.501025236641E-01  
2.499382071466E-01 2.486325119747E-01 -2.487172285180E-01  
-2.499382071466E-01 -2.486325119747E-01 -2.487172285180E-01  
-5.000000000000E-01 0.000000000000E+00 1.088738355650E-04  
-5.000000000000E-01 0.000000000000E+00 -4.997167154451E-01  
-5.000000000000E-01 -5.000000000000E-01 -3.968062666988E-04  
1.593371770289E-01 -3.382108575860E-01 3.385896219852E-01  
-1.593371770289E-01 3.382108575860E-01 3.385896219852E-01  
1.601000706107E-01 -1.605142254248E-01 1.607555070042E-01  
-1.601000706107E-01 1.605142254248E-01 1.607555070042E-01  
1.605611506623E-01 -1.613454063695E-01 -3.378677654450E-01  
-1.605611506623E-01 1.613454063695E-01 -3.378677654450E-01  
1.609690633821E-01 -3.388123074960E-01 -1.617195219195E-01  
-1.609690633821E-01 3.388123074960E-01 -1.617195219195E-01  
1.611697100884E-01 3.387746351176E-01 1.594644721414E-01  
-1.611697100884E-01 -3.387746351176E-01 1.594644721414E-01  
1.612632906965E-01 1.602583164803E-01 3.398395536763E-01  
-1.612632906965E-01 -1.602583164803E-01 3.398395536763E-01  
1.613052156718E-01 1.610752569188E-01 -1.611193960483E-01  
-1.613052156718E-01 -1.610752569188E-01 -1.611193960483E-01  
1.631196161584E-01 3.395526717431E-01 -3.387259058247E-01  
-1.631196161584E-01 -3.395526717431E-01 -3.387259058247E-01  
3.366627593413E-01 3.365657841717E-01 3.410025976716E-01  
-3.366627593413E-01 -3.365657841717E-01 3.410025976716E-01  
3.368570202000E-01 -3.372360231857E-01 1.599882117290E-01  
-3.368570202000E-01 3.372360231857E-01 1.599882117290E-01  
3.368878355984E-01 -1.603660253296E-01 3.384066087248E-01  
-3.368878355984E-01 1.603660253296E-01 3.384066087248E-01  
3.384853625222E-01 1.618451927528E-01 1.599799375605E-01  
-3.384853625222E-01 -1.618451927528E-01 1.599799375605E-01  
3.390834185735E-01 -1.604872785963E-01 -1.612078286723E-01  
-3.390834185735E-01 1.604872785963E-01 -1.612078286723E-01  
3.403632198694E-01 1.620718328231E-01 -3.392664471525E-01  
-3.403632198694E-01 -1.620718328231E-01 -3.392664471525E-01  
3.403981890031E-01 -3.404401333051E-01 -3.355478345684E-01  
-3.403981890031E-01 3.404401333051E-01 -3.355478345684E-01  
3.423730094925E-01 3.415148625879E-01 -1.650345427257E-01  
-3.423730094925E-01 -3.415148625879E-01 -1.650345427257E-01  
4.093697508243E-01 8.704348232453E-02 4.124326849131E-01  
-4.093697508243E-01 -8.704348232453E-02 4.124326849131E-01  
4.104221870960E-01 -8.861031128392E-02 8.771124464250E-02  
-4.104221870960E-01 8.861031128392E-02 8.771124464250E-02  
4.111988586961E-01 8.963186995578E-02 -8.919864050650E-02  
-4.111988586961E-01 -8.963186995578E-02 -8.919864050650E-02  
4.115130101366E-01 4.113712891149E-01 8.631851185919E-02  
-4.115130101366E-01 -4.113712891149E-01 8.631851185919E-02  
4.118535005537E-01 -4.112095140400E-01 -9.338246407305E-02  
-4.118535005537E-01 4.112095140400E-01 -9.338246407305E-02  
4.130658105983E-01 -8.974659614560E-02 -4.085078303165E-01  
-4.130658105983E-01 8.974659614560E-02 -4.085078303165E-01  
8.706755544099E-02 -4.130880926058E-01 -4.086568856246E-01  
-8.706755544099E-02 4.130880926058E-01 -4.086568856246E-01  
8.820313934169E-02 -8.819294272553E-02 -8.984365382552E-02  
-8.820313934169E-02 8.819294272553E-02 -8.984365382552E-02  
8.877110290585E-02 8.889119067008E-02 -4.121373504475E-01

-8.877110290585E-02 -8.889119067008E-02 -4.121373504475E-01  
8.897023770979E-02 -4.103918807577E-01 8.945853613311E-02  
-8.897023770979E-02 4.103918807577E-01 8.945853613311E-02  
8.939613451443E-02 9.002577071155E-02 8.861085879703E-02  
-8.939613451443E-02 -9.002577071155E-02 8.861085879703E-02  
8.956468488758E-02 4.091214980040E-01 4.125710398011E-01  
-8.956468488758E-02 -4.091214980040E-01 4.125710398011E-01  
8.977187572314E-02 -8.917343255006E-02 4.102839207307E-01  
-8.977187572314E-02 8.917343255006E-02 4.102839207307E-01  
8.987281932568E-02 4.117301380455E-01 -8.775037136144E-02  
-8.987281932568E-02 -4.117301380455E-01 -8.775037136144E-02  
1.740298951058E-01 -3.197901251932E-01 -3.326636717707E-02  
-1.740298951058E-01 3.197901251932E-01 -3.326636717707E-02  
1.746720477295E-01 3.192720802794E-01 -4.666373982329E-01  
-1.746720477295E-01 -3.192720802794E-01 -4.666373982329E-01  
1.747793676593E-01 1.800419064086E-01 -3.323974628905E-02  
-1.747793676593E-01 -1.800419064086E-01 -3.323974628905E-02  
1.749439452538E-01 1.789501198085E-01 4.675782733217E-01  
-1.749439452538E-01 -1.789501198085E-01 4.675782733217E-01  
1.754974543118E-01 -1.802792109314E-01 3.343055843645E-02  
-1.754974543118E-01 1.802792109314E-01 3.343055843645E-02  
1.755569506833E-01 -1.810106558529E-01 -4.658456313868E-01  
-1.755569506833E-01 1.810106558529E-01 -4.658456313868E-01  
1.768894028084E-01 3.198635662679E-01 3.218841855484E-02  
-1.768894028084E-01 -3.198635662679E-01 3.218841855484E-02  
1.776086674960E-01 4.671042885882E-01 -3.247933116010E-01  
-1.776086674960E-01 -4.671042885882E-01 -3.247933116010E-01  
1.783340125335E-01 -3.186233105294E-01 4.661345747946E-01  
-1.783340125335E-01 3.186233105294E-01 4.661345747946E-01  
1.793189420808E-01 -4.662324659937E-01 -1.743236764704E-01  
-1.793189420808E-01 4.662324659937E-01 -1.743236764704E-01  
1.795095994115E-01 3.157011085850E-02 3.254392315506E-01  
-1.795095994115E-01 -3.157011085850E-02 3.254392315506E-01  
1.795854488156E-01 3.346511049402E-02 -1.754542796026E-01  
-1.795854488156E-01 -3.346511049402E-02 -1.754542796026E-01  
1.808077205556E-01 -3.273137335708E-02 1.755260304166E-01  
-1.808077205556E-01 3.273137335708E-02 1.755260304166E-01  
1.812184055740E-01 4.668283892354E-01 1.763791394470E-01  
-1.812184055740E-01 -4.668283892354E-01 1.763791394470E-01  
1.814216895373E-01 -3.448350812409E-02 -3.241947634487E-01  
-1.814216895373E-01 3.448350812409E-02 -3.241947634487E-01  
1.829716599930E-01 -4.667310655599E-01 3.245656769984E-01  
-1.829716599930E-01 4.667310655599E-01 3.245656769984E-01  
2.143299054819E-01 -4.296101782930E-01 -4.248253395174E-01  
-2.143299054819E-01 4.296101782930E-01 -4.248253395174E-01  
2.158996699540E-01 6.692696294975E-02 -4.264687230179E-01  
-2.158996699540E-01 -6.692696294975E-02 -4.264687230179E-01  
2.159271781397E-01 -6.892695146248E-02 -7.433823041102E-02  
-2.159271781397E-01 6.892695146248E-02 -7.433823041102E-02  
2.169776893174E-01 -4.300927155358E-01 7.489650591959E-02  
-2.169776893174E-01 4.300927155358E-01 7.489650591959E-02  
2.171517292206E-01 4.321075659121E-01 -7.346180842466E-02  
-2.171517292206E-01 -4.321075659121E-01 -7.346180842466E-02  
2.173039946151E-01 7.099720919892E-02 7.516488294266E-02  
-2.173039946151E-01 -7.099720919892E-02 7.516488294266E-02  
2.180316802352E-01 4.274654518914E-01 4.238716604069E-01  
-2.180316802352E-01 -4.274654518914E-01 4.238716604069E-01  
2.187353129925E-01 -7.281739988091E-02 4.242301714291E-01  
-2.187353129925E-01 7.281739988091E-02 4.242301714291E-01  
2.795929530263E-01 4.318152459906E-01 -4.265554788839E-01  
-2.795929530263E-01 -4.318152459906E-01 -4.265554788839E-01  
2.824415499772E-01 6.823712965187E-02 4.252551782565E-01  
-2.824415499772E-01 -6.823712965187E-02 4.252551782565E-01  
2.829620675610E-01 7.008842717650E-02 -7.455579771644E-02  
-2.829620675610E-01 -7.008842717650E-02 -7.455579771644E-02  
2.830488037189E-01 -6.876404541983E-02 7.456085794701E-02  
-2.830488037189E-01 6.876404541983E-02 7.456085794701E-02  
2.834191909944E-01 -4.288707111958E-01 -7.468942515422E-02  
-2.834191909944E-01 4.288707111958E-01 -7.468942515422E-02  
2.837435418319E-01 4.301778887180E-01 7.532512237249E-02  
-2.837435418319E-01 -4.301778887180E-01 7.532512237249E-02  
2.845375595575E-01 -7.130174251096E-02 -4.258423758140E-01

-2.845375595575E-01 7.130174251096E-02 -4.258423758140E-01  
2.858444957813E-01 -4.329127254910E-01 4.270155137743E-01  
-2.858444957813E-01 4.329127254910E-01 4.270155137743E-01  
3.151435973474E-01 -4.649282095038E-01 -3.223576927945E-01  
-3.151435973474E-01 4.649282095038E-01 -3.223576927945E-01  
3.189063715667E-01 -3.273747099705E-02 -1.755579220957E-01  
-3.189063715667E-01 3.273747099705E-02 -1.755579220957E-01  
3.192803609627E-01 4.680107687731E-01 -1.755589530902E-01  
-3.192803609627E-01 -4.680107687731E-01 -1.755589530902E-01  
3.199776233843E-01 -4.663320527421E-01 1.757347781350E-01  
-3.199776233843E-01 4.663320527421E-01 1.757347781350E-01  
3.200984338038E-01 -3.320680530008E-02 3.238785863399E-01  
-3.200984338038E-01 3.320680530008E-02 3.238785863399E-01  
3.201842765944E-01 3.284114986982E-02 -3.255913085080E-01  
-3.201842765944E-01 -3.284114986982E-02 -3.255913085080E-01  
3.202092124223E-01 3.410170311060E-02 1.754405600931E-01  
-3.202092124223E-01 -3.410170311060E-02 1.754405600931E-01  
3.208318335040E-01 3.143291723484E-01 4.650227874642E-01  
-3.208318335040E-01 -3.143291723484E-01 4.650227874642E-01  
3.219365695342E-01 -3.175072303715E-01 3.437863704264E-02  
-3.219365695342E-01 3.175072303715E-01 3.437863704264E-02  
3.230628510826E-01 -1.859979391717E-01 4.661311649332E-01  
-3.230628510826E-01 1.859979391717E-01 4.661311649332E-01  
3.236568990441E-01 4.675883041164E-01 3.266913991375E-01  
-3.236568990441E-01 -4.675883041164E-01 3.266913991375E-01  
3.240034921649E-02 -3.244654561763E-01 3.201160263724E-01  
-3.240034921649E-02 3.244654561763E-01 3.201160263724E-01  
3.241302429946E-01 1.819561579400E-01 3.282595588768E-02  
-3.241302429946E-01 -1.819561579400E-01 3.282595588768E-02  
3.243608441822E-02 -1.761720625585E-01 1.805909986514E-01  
-3.243608441822E-02 1.761720625585E-01 1.805909986514E-01  
3.248870999648E-01 -1.784179584317E-01 -3.260640885474E-02  
-3.248870999648E-01 1.784179584317E-01 -3.260640885474E-02  
3.252952641497E-01 1.768374247479E-01 -4.671879587700E-01  
-3.252952641497E-01 -1.768374247479E-01 -4.671879587700E-01  
3.268914060134E-01 3.213848586745E-01 -3.371799884213E-02  
-3.268914060134E-01 -3.213848586745E-01 -3.371799884213E-02  
3.314033908791E-01 -3.280808379904E-01 -4.704863571486E-01  
-3.314033908791E-01 3.280808379904E-01 -4.704863571486E-01  
3.314237548522E-02 -1.763441356750E-01 -3.194867976773E-01  
-3.314237548522E-02 1.763441356750E-01 -3.194867976773E-01  
3.326577543980E-02 1.747876715969E-01 3.202805091617E-01  
-3.326577543980E-02 -1.747876715969E-01 3.202805091617E-01  
3.331528361365E-02 -3.230354770795E-01 -1.808619330046E-01  
-3.331528361365E-02 3.230354770795E-01 -1.808619330046E-01  
3.334660006742E-02 3.259679086959E-01 1.803254422063E-01  
-3.334660006742E-02 -3.259679086959E-01 1.803254422063E-01  
3.351417531644E-02 1.744325127494E-01 -1.800139903802E-01  
-3.351417531644E-02 -1.744325127494E-01 -1.800139903802E-01  
3.362745169601E-02 3.253442034152E-01 -3.200954819882E-01  
-3.362745169601E-02 -3.253442034152E-01 -3.200954819882E-01  
4.231726531686E-01 2.147088037060E-01 4.275250680889E-01  
-4.231726531686E-01 -2.147088037060E-01 4.275250680889E-01  
4.237039386919E-01 -2.830477980995E-01 -6.854719489103E-02  
-4.237039386919E-01 2.830477980995E-01 -6.854719489103E-02  
4.243597926392E-01 -2.169273837084E-01 7.104725223613E-02  
-4.243597926392E-01 2.169273837084E-01 7.104725223613E-02  
4.245787478163E-01 -2.179481063597E-01 -4.299212724116E-01  
-4.245787478163E-01 2.179481063597E-01 -4.299212724116E-01  
4.256180535721E-01 2.836337782235E-01 7.094269711879E-02  
-4.256180535721E-01 -2.836337782235E-01 7.094269711879E-02  
4.267048674654E-01 2.793990562488E-01 -4.331971928242E-01  
-4.267048674654E-01 -2.793990562488E-01 -4.331971928242E-01  
4.275208363347E-01 2.165468062884E-01 -6.788825850185E-02  
-4.275208363347E-01 -2.165468062884E-01 -6.788825850185E-02  
4.277240931778E-01 4.218481468372E-01 -2.800987366440E-01  
-4.277240931778E-01 -4.218481468372E-01 -2.800987366440E-01  
4.285608214036E-01 -2.859082372131E-01 4.304172114871E-01  
-4.285608214036E-01 2.859082372131E-01 4.304172114871E-01  
4.287416657963E-01 -4.242115244532E-01 2.864091429712E-01  
-4.287416657963E-01 4.242115244532E-01 2.864091429712E-01  
4.295516809128E-01 7.541465394197E-02 -2.165775925989E-01



-4.295516809128E-01 -7.541465394197E-02 -2.165775925989E-01  
4.296489255003E-01 -4.264002384808E-01 -2.195046254844E-01  
-4.296489255003E-01 4.264002384808E-01 -2.195046254844E-01  
4.302510749119E-01 -7.443281145254E-02 2.160420194563E-01  
-4.302510749119E-01 7.443281145254E-02 2.160420194563E-01  
4.303345489777E-01 -7.400057225157E-02 -2.818618290342E-01  
-4.303345489777E-01 7.400057225157E-02 -2.818618290342E-01  
4.314135538046E-01 7.444263469726E-02 2.840428527183E-01  
-4.314135538046E-01 -7.444263469726E-02 2.840428527183E-01  
4.335594524145E-01 4.277177437064E-01 2.159629456722E-01  
-4.335594524145E-01 -4.277177437064E-01 2.159629456722E-01  
4.651480711687E-01 -1.764751474308E-01 3.185884237530E-01  
-4.651480711687E-01 1.764751474308E-01 3.185884237530E-01  
4.651857777761E-01 -3.213571540852E-01 -3.164229269851E-01  
-4.651857777761E-01 3.213571540852E-01 -3.164229269851E-01  
4.655450001519E-01 -3.240468105347E-01 1.819437648816E-01  
-4.655450001519E-01 3.240468105347E-01 1.819437648816E-01  
4.664240589141E-01 1.759830807178E-01 1.810692139397E-01  
-4.664240589141E-01 -1.759830807178E-01 1.810692139397E-01  
4.667115457331E-01 -1.748491838276E-01 -1.793413176721E-01  
-4.667115457331E-01 1.748491838276E-01 -1.793413176721E-01  
4.672588243999E-01 3.268098701754E-01 3.216964052407E-01  
-4.672588243999E-01 -3.268098701754E-01 3.216964052407E-01  
4.679285757237E-01 1.744244644449E-01 -3.203174952778E-01  
-4.679285757237E-01 -1.744244644449E-01 -3.203174952778E-01  
4.698881577825E-01 3.257075121209E-01 -1.774604453732E-01  
-4.698881577825E-01 -3.257075121209E-01 -1.774604453732E-01  
6.852272217158E-02 -4.259596308376E-01 -2.817815204454E-01  
-6.852272217158E-02 4.259596308376E-01 -2.817815204454E-01  
6.943025718582E-02 -7.435057903699E-02 -2.177619725342E-01  
-6.943025718582E-02 7.435057903699E-02 -2.177619725342E-01  
6.965917899339E-02 -7.488797974846E-02 2.823972266034E-01  
-6.965917899339E-02 7.488797974846E-02 2.823972266034E-01  
6.986605286715E-02 4.260730058021E-01 2.842492002695E-01  
-6.986605286715E-02 -4.260730058021E-01 2.842492002695E-01  
6.988642952538E-02 7.460784126198E-02 -2.843673096034E-01  
-6.988642952538E-02 -7.460784126198E-02 -2.843673096034E-01  
7.016186694842E-02 7.486647882329E-02 2.166654237998E-01  
-7.016186694842E-02 -7.486647882329E-02 2.166654237998E-01  
7.017485851697E-02 4.244810306405E-01 -2.149535083593E-01  
-7.017485851697E-02 -4.244810306405E-01 -2.149535083593E-01  
7.041526372354E-02 -4.251461196127E-01 2.183233553028E-01  
-7.041526372354E-02 4.251461196127E-01 2.183233553028E-01  
7.350252968366E-02 2.162452751951E-01 -4.307350378641E-01  
-7.350252968366E-02 -2.162452751951E-01 -4.307350378641E-01  
7.376673919999E-02 -2.157603466778E-01 -6.896335390725E-02  
-7.376673919999E-02 2.157603466778E-01 -6.896335390725E-02  
7.440559356229E-02 2.835116097978E-01 -6.940279525506E-02  
-7.440559356229E-02 -2.835116097978E-01 -6.940279525506E-02  
7.446473101029E-02 -2.828952909320E-01 7.019936280997E-02  
-7.446473101029E-02 2.828952909320E-01 7.019936280997E-02  
7.468620641466E-02 -2.846622490248E-01 -4.310574758903E-01  
-7.468620641466E-02 2.846622490248E-01 -4.310574758903E-01  
7.496963592362E-02 2.821772427896E-01 4.301062101446E-01  
-7.496963592362E-02 -2.821772427896E-01 4.301062101446E-01  
7.572347336961E-02 -2.175727360950E-01 4.298189794801E-01  
-7.572347336961E-02 2.175727360950E-01 4.298189794801E-01  
7.583132156055E-02 2.182619000417E-01 7.064564228895E-02  
-7.583132156055E-02 -2.182619000417E-01 7.064564228895E-02  
1.244816085298E-01 -2.495926655267E-01 1.515979447876E-04  
-1.244816085298E-01 2.495926655267E-01 1.515979447876E-04  
1.250283439138E-01 2.492840228957E-01 -4.996652433450E-01  
-1.250283439138E-01 -2.492840228957E-01 -4.996652433450E-01  
1.254684065822E-01 2.505134377769E-01 -1.732072421757E-04  
-1.254684065822E-01 -2.505134377769E-01 -1.732072421757E-04  
1.255286326185E-01 -2.505692661320E-01 -4.999244008995E-01  
-1.255286326185E-01 2.505692661320E-01 -4.999244008995E-01  
2.483909472231E-01 4.997493790055E-01 -3.746404609943E-01  
-2.483909472231E-01 -4.997493790055E-01 -3.746404609943E-01  
2.494110650709E-01 5.086766523690E-04 -1.250298513609E-01  
-2.494110650709E-01 -5.086766523690E-04 -1.250298513609E-01  
2.500232199331E-01 -1.418733474804E-03 3.747661836173E-01

-2.500232199331E-01 1.418733474804E-03 3.747661836173E-01  
2.501482781586E-01 -4.998816882657E-01 1.249031681290E-01  
-2.501482781586E-01 4.998816882657E-01 1.249031681290E-01  
2.502572652169E-01 -4.988539203012E-01 -1.251373814382E-01  
-2.502572652169E-01 4.988539203012E-01 -1.251373814382E-01  
2.502995908819E-01 9.229503421463E-04 1.251222529211E-01  
-2.502995908819E-01 -9.229503421463E-04 1.251222529211E-01  
2.506631406375E-01 -1.449003045664E-03 -3.754353904709E-01  
-2.506631406375E-01 1.449003045664E-03 -3.754353904709E-01  
2.507951465675E-01 4.977519115674E-01 3.754214358735E-01  
-2.507951465675E-01 -4.977519115674E-01 3.754214358735E-01  
3.458565941127E-04 3.754656862151E-01 2.507183217979E-01  
-3.458565941127E-04 -3.754656862151E-01 2.507183217979E-01  
3.536621101733E-04 1.249987862458E-01 -2.505223258376E-01  
-3.536621101733E-04 -1.249987862458E-01 -2.505223258376E-01  
3.737536589180E-01 -2.491382479686E-01 7.127832172280E-04  
-3.737536589180E-01 2.491382479686E-01 7.127832172280E-04  
3.744386539759E-01 2.478586346625E-01 4.996111476724E-01  
-3.744386539759E-01 -2.478586346625E-01 4.996111476724E-01  
3.759177082255E-01 2.509378445680E-01 3.382650834915E-05  
-3.759177082255E-01 -2.509378445680E-01 3.382650834915E-05  
3.764528874235E-01 -2.524016270491E-01 -4.994895035236E-01  
-3.764528874235E-01 2.524016270491E-01 -4.994895035236E-01  
4.232544715432E-04 1.251418131583E-01 2.499282893455E-01  
-4.232544715432E-04 -1.251418131583E-01 2.499282893455E-01  
4.994397317610E-01 -3.748700000106E-01 2.503057703519E-01  
-4.994397317610E-01 3.748700000106E-01 2.503057703519E-01  
4.994762370895E-01 -1.249197473316E-01 2.498319904775E-01  
-4.994762370895E-01 1.249197473316E-01 2.498319904775E-01  
4.998452154880E-01 3.751922391084E-01 -2.501261301909E-01  
-4.998452154880E-01 -3.751922391084E-01 -2.501261301909E-01  
4.999695765463E-01 -1.251320764127E-01 -2.495149137517E-01  
-4.999695765463E-01 1.251320764127E-01 -2.495149137517E-01  
6.998464259761E-04 3.746465781100E-01 -2.493064884394E-01  
-6.998464259761E-04 -3.746465781100E-01 -2.493064884394E-01  
-5.000000000000E-01 -5.000000000000E-01 4.453847030844E-01

## 12. References

- 1 V. N. Baumer, S. S. Galkin, L. V. Glushkova, T. P. Rebrova and Z. V. Shtitelman, *Inorg. Chem.*, 2006, **45**, 7367–7371.
- 2 R. J. Angel, G. D. Gatta, T. B. Ballaran and M. A. Carpenter, *The Canadian Mineralogist*, 2008, **46**, 1465–1476.
- 3 E. R. Williams, A. Simmonds, J. A. Armstrong and M. T. Weller, *J. Mater. Chem.*, 2010, **20**, 10883–10887.
- 4 G. D. Gatta, P. Lotti, G. Nénert and V. Kahlenberg, *Microporous and Mesoporous Materials*, 2014, **185**, 137–148.
- 5 A. A. Finch, H. Friis and M. Maghrabi, *Phys. Chem. Miner.*, 2016, **43**, 481–491.
- 6 T. E. Warner and J. Hutzen Andersen, *Phys. Chem. Miner.*, 2012, **39**, 163–168.
- 7 W. P. Davey, *Phys. Rev.*, 1923, **21**, 143–161.
- 8 W. Döll and W. Klemm, *Zeitschrift für anorganische und allgemeine Chemie*, 1939, **241**, 239–258.
- 9 L. G. Schulz, *Acta Cryst*, 1952, **5**, 266–268.
- 10 V. Meisalo and O. Inkinen, *Acta Cryst*, 1967, **22**, 58–65.
- 11 A. L. Fathima, S. Sivananthan, C. V. Somasundari and N. Neelakandapillai, 2012, **4**.
- 12 V. S. Urusov, K. I. Tobelko, V. V. Slavinskii, and O. S. Khusainova, *Inorg. Mater.*, 1973, **9**, 591–596.
- 13 J. R. Goldsmith and F. Laves, *Geochimica et Cosmochimica Acta*, 1954, **5**, 1–19.
- 14 F. J. Garlick and F. Gibson, *Proc. Phys. Soc.*, 1948, **60**, 574–590.
